1

2           **The human mitochondrial 12S rRNA m<sup>4</sup>C methyltransferase METTL15 is**  
3                           **required for proper mitochondrial function**

4

5   Hao Chen<sup>1,2,#</sup>, Zhennan Shi<sup>1,2,#</sup>, Jiaojiao Guo<sup>3,#</sup>, Kao-jung Chang<sup>1,2</sup>, Qianqian Chen<sup>1,2</sup>,  
6   Conghui Yao<sup>2</sup>, Marcia C. Haigis<sup>2</sup>, Yang Shi<sup>1,2,\*</sup>

7

8   <sup>1</sup>Division of Newborn Medicine and Epigenetics Program, Department of Medicine,  
9   Boston Children's Hospital, Boston, MA 02115, USA.

10   <sup>2</sup>Department of Cell Biology, Harvard Medical School, Boston, MA 02115, USA.

11   <sup>3</sup>College of Science, Northeastern University, 360 Huntington Ave., Boston, MA  
12   02115, USA.

13

14   # The authors wish it be known that, in their opinion, the first three authors should be  
15   regarded as joint First Authors.

16

17   \*To whom correspondence should be addressed

18   Phone: 6179193100; Email: ([yshi@hms.harvard.edu](mailto:yshi@hms.harvard.edu))

19   Running title: METTL15 is the methyltransferase for mitochondrion12S m<sup>4</sup>C839

20 **ABSTRACT**

21 Mitochondrial DNA (mtDNA) gene expression is coordinately regulated pre- and  
22 post-transcriptionally, and its perturbation can lead to human pathologies.  
23 Mitochondrial ribosomal RNAs (mt-rRNAs) undergo a series of nucleotide  
24 modifications following release from polycistronic mitochondrial RNA (mtRNA)  
25 precursors, which is essential for mitochondrial ribosomal biogenesis. Cytosine N<sup>4</sup>  
26 methylation (m<sup>4</sup>C) at position 839 of the 12S small subunit (SSU) mt-rRNA was  
27 identified decades ago, however, its biogenesis and function have not been elucidated  
28 in details. Here we demonstrate that human Methyltransferase Like 15 (METTL15) is  
29 responsible for 12S mt-rRNA methylation at C839 (m<sup>4</sup>C839) both *in vivo* and *in vitro*.  
30 We tracked the evolutionary history of RNA m<sup>4</sup>C methyltransferases and revealed the  
31 difference in substrates preference between METTL15 and its bacterial ortholog rsmH.  
32 Additionally, unlike the very modest impact on ribosome upon loss of m<sup>4</sup>C  
33 methylation in bacterial SSU rRNA, we found that depletion of METTL15  
34 specifically causes severe defects in mitochondrial ribosome assembly, which leads to  
35 an impaired translation of mitochondrial protein-coding genes and a decreased  
36 mitochondrial respiration capacity. Our findings point to a co-evolution of  
37 methyltransferase specificities and modification patterns in rRNA with differential  
38 impact on prokaryotic ribosome versus eukaryotic mitochondrial ribosome.

39

40 **Key words:** m<sup>4</sup>C methylation, mt-12S rRNA, mitochondrial translation

## 41 INTRODUCTION

42 Mitochondrial gene expression requires a series of inter-connected processes  
43 encompassing mtDNA replication and repair, mitochondrial RNA (mtRNA)  
44 transcription, maturation and mitoribosome assembly **(1, 2)**. The mt-RNAs, especially  
45 rRNAs and tRNAs, are subjected to extensive enzyme-mediated modifications, which  
46 play key roles in RNA stability, RNA structure, and mitochondrial ribosome assembly  
47 **(3, 4)**. Some of these modifications are deposited co-transcriptionally or immediately  
48 after transcription, while others occur when the rRNA is assembled into the  
49 pre-ribosomal particle **(3-5)**.

50

51 Prokaryotic and eukaryotic cytoplasmic rRNAs contain more than 30 and 200  
52 modified sites, respectively, but only around 10 modifications are found in the  
53 mitochondrial rRNAs **(4, 5)**. These modifications are located at the functionally  
54 important regions of mitoribosome, such as the decoding center (DC) of the small  
55 subunit (SSU), suggesting that these modifications might be retained due to their  
56 essential roles **(5, 6)**. The best characterized example is the TFB1M-mediated  
57 dimethylation on the two highly conserved sites, A936 and A937, at the 3'-end of the  
58 mt 12S rRNA, which is necessary for the assembly of the SSU **(7, 8)**. The NOP2/Sun  
59 RNA Methyltransferase 4 (NSUN4) forms a complex with MTERF4 to catalyze m<sup>5</sup>C  
60 methylation at the position 841 in mt-12S rRNA and to coordinate the mitoribosome  
61 assembly **(9, 10)** However, enzymes for m<sup>4</sup>C and m<sup>5</sup>U (uracil) methylation in

62 mammalian mitochondrial rRNAs remain to be identified (**6, 11**).

63 Mitochondrial diseases may be caused by mutations in mitochondrial DNA (mtDNA)  
64 (**12**), but growing evidence suggests that defects in the nuclear genes involved in  
65 mitochondrial RNA modifications can also lead to human mitochondrial diseases . For  
66 instance, loss of TFB1M results in mitochondrial dysfunction that leads to impaired  
67 insulin secretion and diabetes (**13**). A missense mutation in pseudouridylate synthase 1  
68 (PUS1), which converts uridine to pseudouridine at several mitochondrial tRNA  
69 positions, has been reported to be associated with myopathy, lactic acidosis and  
70 sideroblastic anaemia (MLASA) (**14**). Moreover, a defect in the mitochondrial rRNA  
71 methyltransferase MRM2 that causes loss of 2'-O-methyl modification at position  
72 U1369 in the human mitochondrial 16S rRNA leads to MELAS-like clinical  
73 syndrome in patients (**15**). In addition, an 11p14.1 microdeletion was identified to be  
74 highly associated with Attention-Deficit/Hyperreactive Disorder (ADHD), autism,  
75 developmental delay, and obesity (**16**). Intriguingly, the microdeletion region always  
76 encompasses a METTL-family protein METTL15. More recently, a trans-ancestral  
77 meta-analysis of genome-wide association studies uncovered a completely novel  
78 single nucleotide polymorphism (SNP) (rs10835310) at METTL15 associated with  
79 childhood obesity, (**17**), further implicating the involvement of METTL15 in this  
80 human syndrome, although the underlying molecular mechanisms for these  
81 associations is still unclear.

82

83 In this current study, we demonstrate that human METTL15 protein, encoded by a  
84 nuclear gene, is localized in mitochondria and is responsible for methylation of 12S  
85 mt-RNA at C839 *in vivo* and *in vitro*. Furthermore, we demonstrate that  
86 METTL15-dependent modification of 12S mt-rRNA is necessary for mitoribosome  
87 maturation. Our study reveals that methylation of 12S mt-rRNA m<sup>4</sup>C839 by  
88 METTL15 is an important epitranscriptome modification, critical for efficient  
89 mitochondrial protein synthesis and respiratory function.

90

## 91 RESULTS

### 92 METTL15 is a mitochondrial protein associated with 12S mt-rRNA

93 METTL15 is a member of the methyltransferase like (METTL) family, characterized  
94 by the presence of a binding domain for S-adenosyl methionine, which is a  
95 methyl-group donor for methylation reactions (**18, 19**). Through phylogenetic analysis,  
96 we found that METTL15 is highly conserved during evolution and is an ortholog of  
97 the bacterial methyltransferase, rsmH (**Figure 1A**), which is responsible for the  
98 N<sup>4</sup>-methylation of m<sup>4</sup>Cm1402 in 16S rRNA in almost all species of bacteria  
99 (**Supplementary Figures S1A**)(**20**). Given its similarity with rsmH, we wondered  
100 whether METTL15 is also a m<sup>4</sup>Cm methyltransferase for rRNA. To address this  
101 possibility, we purified SSU rRNA fragments containing C1402 or its equivalent  
102 nucleotide from four representative species and measured the levels of m<sup>4</sup>Cm by  
103 HPLC-MS/MS. We didn't detect any meaningful levels of m<sup>4</sup>Cm in the cytoplasmic  
104 SSU rRNAs from fruitfly, zebrafish or human, though a large amount of Cm was  
105 readily detectable (**Supplementary Figures S1B**), which is consistent with previous  
106 reports that the SSU rRNAs of those eukaryotic cells were abundantly modified by  
107 2'-O-methylated cytosine (**Supplementary Figures S1C**)(**21**).

108

109 In eukaryotic cells, mitochondria has its own ribosome translating mitochondrial  
110 mRNAs, which prompts us to investigate whether METTL15 is a  
111 mitoribosome-specific methyltransferase. Indeed, a considerable amount of

112 mitochondrial genome-encoded RNAs, especially mt-12S and mt-16S rRNA, but not  
113 cytoplasmic RNAs such as 18S rRNAs, are found to be associated with the HA tagged  
114 METTL15 in an RNA immunoprecipitation experiment (RIP) (**Figure 1B**).  
115 Consistently, immunofluorescence experiments showed that METTL15 is exclusively  
116 localized in the mitochondria, dependent on its putative mitochondria-targeting  
117 signals (MTS) (**Figure 1C**)(**22**), which suggests that METTL15 is a *bona fide*  
118 mitochondria protein that interacts with mitochondria rRNAs.

119

#### 120 **METTL15 is responsible for methylation of 12S mt-rRNA m<sup>4</sup>C839 *in vivo***

121 To unambiguously identify the *in vivo* methylation sites modified by METTL15, we  
122 profiled the mitochondrial RNA methylome in wildtype (WT) and METTL15  
123 knockout (KO) cells using RNA bisulfite sequencing (RNA BS-seq), which detects  
124 both m<sup>5</sup>C and m<sup>4</sup>C cytosine modifications in RNAs (**23**). The RNA BS-seq revealed  
125 that in the absence of METTL15, the methylation level of mt-12S C839 is  
126 dramatically decreased from 58% to near background level (0.9%), which suggests  
127 that methylation of mt-12S C839 may be mediated by METTL15 (**Figure 2A and 2B**).  
128 To validate the BS-seq results, we designed sequence-specific primers to amplify a  
129 145 nucleotide (nt) region surrounding C839 from bisulfite-treated RNA samples  
130 and employed targeted sequencing (detailed procedure in the Methods) to examine the  
131 methylation levels of C839. In agreement with the BS-seq result, methylation of C839  
132 was found to almost completely disappear in the METTL15 KO cells

133 **(Supplementary Figures S2C)**. Importantly, the methylation level of m<sup>4</sup>C839 can be  
134 fully rescued by wild type METTL15, but not a catalytically compromised mutant  
135 METTL15 (GA mutant: <sub>108</sub>GSGG<sub>112</sub> to <sub>108</sub>ASAA<sub>112</sub>) **(Supplementary Figures**  
136 **S2C)(24)**, which strongly supports the hypothesis that METTL15 is responsible for  
137 m<sup>4</sup>C839 on 12S mt-rRNA *in vivo* and is consistent with a very recent study **(25)**.  
138 Interestingly, the neighbouring methylation site, m<sup>5</sup>C841, which is catalyzed by  
139 NSUN4 **(9)**, is reduced (but not eliminated) upon METTL15 deletion. In addition, the  
140 m<sup>5</sup>C841 reduction could be fully restored by reintroducing wild type METTL15 and  
141 partially restored by enzymatically inactive METTL15, suggesting METTL15 might  
142 regulate the installation of m<sup>5</sup>C841 by NSUN4 in both enzymatic activity-dependent  
143 and independent manner **(Supplementary Figure S2C)**.

144

145 Given both m<sup>4</sup>C(m) and m<sup>5</sup>C are able to block the C-to-T transition by bisulfite  
146 treatment and therefore can't be distinguished in the BS-seq analysis **(23)**, we turned  
147 to an optimized LC-MS/MS method to efficiently separate different forms of methyl  
148 cytosines in order to define the exact type of methylation in C839 **(Supplementary**  
149 **Figures S2B)**. As shown in **Figure 2C**, m<sup>4</sup>C was detected in WT cell lines but  
150 reduced to a background level in the METTL15 KO cells, indicating that METTL15  
151 may be a m<sup>4</sup>C methyltransferase for C839. Consistent with the BS-seq data,  
152 HPLC-MS/MS analysis also found a modest reduction of m<sup>5</sup>C at C841 due to  
153 METTL15 depletion, which again points to a potential crosstalk between C839 and



154 C841 methylation. m<sup>4</sup>C methylation of C839 is mediated by the intrinsic enzymatic  
155 activity of METTL15 as reintroduction of wildtype, but not the catalytically inactive  
156 METLL15, back into the METTL15 KO cells restored the methylation level of  
157 m<sup>4</sup>C839 (**Figures 2D** and **Supplementary Figures S2A/C**). Collectively, these  
158 findings demonstrate that METTL15 is likely the enzyme responsible for methylation  
159 of mt-12S m<sup>4</sup>C839 *in vivo* (**Supplementary Figures S2D**).

160

### 161 **METTL15 methylates 12S mt-rRNA m<sup>4</sup>C839 *in vitro***

162 We next asked whether recombinant METTL15 mediates 12S mt-rRNA methylation  
163 at C839. C-terminal FLAG-tagged METTL15 was expressed in 293T cells and  
164 purified using an ANTI-FLAG M2 Affinity column (**Supplementary Figures S3A**).  
165 Recombinant METTL15 was incubated with 12S mt-rRNA oligos (nt 832 to 846) in  
166 the presence of d3-SAM (S-(5'-Adenosyl)-L-methionine-d3) as a methyl group donor,  
167 and the resulting rRNAs oligos were isolated for LC/MS measurement. As shown in  
168 **Figure 3A**, m<sup>4</sup> methylation of C839 was successfully detected while the catalytically  
169 compromised METTL15 failed to mediate C839 methylation.

170

171 As described before, a main difference between the m<sup>4</sup>C methylation site of bacterial  
172 ribosome and human mitoribosome is that cytosine in bacterial ribosome is mainly  
173 m<sup>4</sup>Cm while in the human mitoribosome at the equivalent cytosine residue, it's m<sup>4</sup>C  
174 without the 2'-O methylation. This prompted us to determine whether human

175 MEETTL15 (hMETTL15) displays any preference for unmodified cytosine versus  
176 2'-O methylated cytosine. Consistently, unmodified cytosine in the mt-12S rRNA  
177 appears to be a better substrate for hMETTL15 *in vitro* (C vs Cm in **Figure 3B**). In  
178 contrast, rsmH shows higher apparent activity towards Cm compared with C of mt  
179 12S rRNAs (solid line in **Figure 3C**, **Supplementary Figures S3C**). Interestingly, we  
180 found an aromatic amino acid (W139) in rsmH, which has been changed into Valine  
181 (V210) in the eukaryotic orthologs (METTL15), might potentially mediate the  
182 interaction of 2'-O methyl group of Cm with rsmH based on the published rsmH  
183 structure (**Supplementary Figures S3B**) (26). These results confirmed that human  
184 METTL15 is a *bona fide* m<sup>4</sup>C methyltransferase and has a higher activity toward  
185 unmodified cytosine compared with 2'-O methylated cytosine *in vitro*.

186

### 187 **Depletion of METTL15 inhibits the function of mitoribosomes**

188 As METTL15 is localized in mitochondria, we first investigated the effect of  
189 METTL15 deletion on mtDNA copy number and transcription of mitochondrial  
190 genome-encoded genes. We found METTL15 deletion only causes minor changes of  
191 mtDNA copy number and transcription (**Figure S4A/B**). Given that the methylation  
192 site lies in the critical region of mitoribosome, we asked whether loss of METTL15  
193 affects the function of mitoribosome. We performed the mitochondrial ribosome  
194 profiling in a 10%-30% sucrose gradient to determine whether there was any  
195 difference in the assembly of mitoribosome. The distribution of SSU and LSU in the

196 sucrose gradient were detected by the presence of 12S and 16S mt-rRNA, respectively.  
197 According to the protein complex density, the first peak of 12S rRNA (fraction 8)  
198 represents SSU, while the first peak of 16S rRNA (fraction 9) represents LSU, and the  
199 co-fractionated peaks (fractions 12 and 13) represent the mature ribosome. The  
200 co-fractionation ratio of 12S and 16S mt-rRNAs in METTL15 KO cells was  
201 significantly reduced (compared with fractions 12-13 in wildtype cells), thus  
202 identifying a major defect in mitoribosome assembly. In addition, the ratio of mRNA  
203 encoded by mitochondrial genome was also significantly reduced in the 55S mature  
204 monosomes (fractions 12-13), indicating compromised translation efficiency, which  
205 was consistent with the observed mitoribosome assembly defects (**Figure 4A and 4B**).  
206 Western blotting results of two representative mitochondrial protein-coding genes,  
207 COX2 and ND6, showed that the levels of the protein products were also reduced  
208 significantly. (**Figure 4C**). Importantly, the translational defects of the  
209 mitochondria-encoded genes could be rescued by wild type METTL15 but not the  
210 catalytic mutant (**Figure S4D**), suggesting the function of METTL15 on  
211 mitoribosome is m<sup>4</sup>C849 dependent. These data thus demonstrate that the methylation  
212 mediated by METTL15 is critical for mitoribosomes maturation and mt-mRNA  
213 translation.

214

## 215 **Proper functions of mitochondria are affected by METTL15 depletion**

216 The most prominent role of mitochondria is to produce adenosine triphosphate (ATP)-

217 through respiration, and to regulate cellular metabolism. Most of the ATP synthesized  
218 during glucose metabolism is produced in the mitochondria through oxidative  
219 phosphorylation (OxPhos) powered by the Electron Transport Chain (ETC) complex,  
220 which consists essentially of about 70 nuclear-encoded proteins and 13  
221 mtDNA-encoded proteins translated by mitoribosome in mitochondria. To determine  
222 the impact of loss of METTL15 on respiratory activity, we measured the respiratory  
223 activity of METTL15 KO cells using a Seahorse XF96 analyzer. The oxygen  
224 consumption rate (OCR) of the METTL15 KO cells was substantially lower than that  
225 of WT cells, and this effect is dependent on the enzymatic activity, indicating that  
226 METTL15 mediated m<sup>4</sup>C839 on 12S mt-rRNA is required for proper oxidative  
227 phosphorylation function. (**Figure 5A/B**). After two days in culture, the medium of  
228 METTL15 KO cells turned more yellow indicating a lower pH and more lactate  
229 secretion, although the cell numbers are comparable between WT and KO, (**Figure**  
230 **S5A**). Consistently, extracellular acidification rate (ECAR), which approximates  
231 glycolytic activity, was significantly up-regulated in the METTL15 KO cells, likely to  
232 compensate for dysfunction of the mitochondria (**Figure 5C**). Furthermore,  
233 metabolites profiling shows a decline of citrate and alpha-ketoglutarate, the  
234 intermediators of the TCA cycle, which is closely coupled with OxPhos to generate  
235 ATP. It is also known that an essential function of respiration in proliferating cells is  
236 to support aspartate biosynthesis (**27, 28**). The decline of the aspartate level in  
237 METTL15 KO cell is consistent with the compromised respiration function. At the  
238 same time, the upregulated level of lactate suggested that cells use more anaerobic

239 glycolysis to compensate for impaired mitochondrial function (**Figure 5D/S5A**).

240 These results indicate that METTL15 is important for maintaining mitochondrial

241 function and cellular metabolic homeostasis.

242

243

## 244 **DISCUSSION**

245 Here we describe the identification of METTL15 as the methyltransferase that  
246 generates m<sup>4</sup>C839 in human 12S mt-rRNA. The phylogenetic analysis indicates that  
247 METTL15 orthologs exist in most eukaryotes, which implies the importance of this  
248 methyltransferase for proper functions of mitoribosome. Consistent with this  
249 hypothesis, mitochondrial translation is inhibited and oxidative phosphorylation is  
250 remarkably compromised in METTL15 KO cells, identifying an important function of  
251 METTL15 in regulating mitochondria functions by methylating 12S mt-rRNA.

252

### 253 **Crosstalk between m<sup>4</sup>C839 and m<sup>5</sup>C841 on 12S mt-rRNA**

254 Ribosomal maturation involves multiple steps of subunit assembly and incorporation  
255 of chemical modifications into the rRNA (3). The assembly of protein components  
256 and rRNAs has been well characterized through high-resolution Cryo-EM, while the  
257 process of modification deposition is still largely unclear (29). For the bacterial 16S  
258 rRNA, quantitative analysis of rRNA modifications finds that the modification events  
259 seem to occur in a 5'-to-3' sequential order: from 5' body domain, the 3' head domain,  
260 to 3' minor domain (30). In this current study, we found that m<sup>4</sup>C839 methylation  
261 appears to precede m<sup>5</sup>C841 and is important for the nearby m<sup>5</sup>C841 methylation,  
262 suggesting crosstalk between modifications of the two nearby residues. Furthermore,  
263 the enzymatically inactive METTL15 can partially restore the m<sup>5</sup>C841 methylation  
264 decreased in METTL15-null cells, raising the question of whether the crosstalk is

265 mediated by physical interactions between METTL15 and the m<sup>5</sup>C methyltransferase,  
266 NSUN4. Undoubtedly, the investigation of how modifications of mt-rRNA are  
267 coordinately deposited in an orderly manner will significantly increase our  
268 understanding of mitoribosome maturation **(31)**.

269

### 270 **Co-evolution of rRNA methyltransferases and rRNA functions**

271 Unlike the universally conserved rRNA modifications (such as m<sup>6,6</sup>A) **(5)**, the  
272 N<sup>4</sup>-methylation of SSU rRNA is only maintained in prokaryotes and mitochondria of  
273 eukaryotic cells. In bacteria, rsmI and rsmH (which is the bacterial METTL15  
274 ortholog) install 2'-O methylation and N<sup>4</sup>-methylation, respectively, on the equivalent  
275 cytosine to generate m<sup>4</sup>Cm1402 of bacterial 16S rRNAs **(20)**. There are two notable  
276 differences between methylation of human mt-rRNAs versus bacterial rRNA. First, at  
277 the molecular level, our *in vitro* enzymatic assays showed that rsmH prefers Cm as a  
278 substrate and m<sup>4</sup>C methylation at C1402 in bacteria may occur subsequent to the 2'-O  
279 methylation. Interestingly, the aromatic pocket in the rsmH enzymatic domain appears  
280 to have degenerated in its eukaryotic ortholog METTL15 proteins during evolution,  
281 and this might be coupled with the loss of rsmI in eukaryotic organisms. Second, the  
282 m<sup>4</sup>C methylation is essential for the mitoribosome assembly and maturation, while in  
283 contrast, m<sup>4</sup>Cm loss in bacteria only generates a rather modest phenotype **(20)**. These  
284 findings suggest that m<sup>4</sup>C appears to have gained importance in regulating  
285 mitochondrial functions during evolution.

## 286 **METTL15 and human diseases**

287 Previous studies demonstrate that mitochondrial dysfunctions in mature adipocytes  
288 cause defects in fatty acid oxidation, secretion of adipokines, and dysregulation of  
289 glucose homeostasis (**32**). Importantly, a reduction in the oxidative capacity of brown  
290 adipocytes results in impaired thermogenesis, and has been linked to diet-induced  
291 obesity (**33**). In this context, it's important to note that microdeletion and SNPs in  
292 METTL15 gene are highly associated with obesity (**16, 17**). Therefore, we speculate  
293 that if altered METTL15 activity impact obesity onset, it's likely to be due to the  
294 ability of METTL5 to regulate mitochondrial functions by methylating 12S mt-rRNA.

295 In summary, we identify METTL15 as a m<sup>4</sup>C methyltransferase that specifically  
296 mediates m<sup>4</sup>C methylation of 12S mt-rRNA at residue C839. Interestingly, our  
297 HPLC-MS/MS and enzymological analyses reveal a methylation pattern shift during  
298 evolution, which is likely a consequence of degeneration of an ancestral aromatic  
299 pocket present only in bacterial METTL15 orthologs, which recognizes 2'-O-methyl  
300 cytosine. This pocket is absent in eukaryotic METTL15, which is probably why  
301 human METTL15 prefers C839 but not Cm839. Importantly, METTL15 depletion  
302 affects mitoribosome assembly, inhibits translation of mitochondria encoded proteins,  
303 and compromises the oxidative phosphorylation, which underlies the importance of  
304 METTL15 in maintaining mitochondrial functions. Future experiments will determine  
305 whether METTL15 plays a role in human diseases such as obesity through its ability  
306 to mediate methylation of mitochondrial rRNA.



## 307 **MATERIALS AND METHODS**

### 308 **Constructs and Antibodies**

309 For the expression of METTL15 protein, METTL15 ORF cDNA was cloned into  
310 pHAGE or pET28a expression vector (Invitrogen). METTL15 and rsmH mutants  
311 were generated using the QuikChange Site-Directed Mutagenesis Kit (Stratagene)  
312 according to the manufacturer's protocol.

313 Anti-FLAG (M2) beads and antibody (F1804) were purchased from Sigma. Total  
314 OXPPOS Human WB Antibody Cocktail (ab110411) and anti-ND6 (ab81212)  
315 antibodies were purchased from Abcam. Anti-COX2 (55070-1-AP)antibody was  
316 purchased from Proteintech.

317

### 318 **Immunofluorescence**

319 Cells were seeded in 24-well plates at a density of 20,000 cells/well one day before IF  
320 examination. Through standard fixation, permeabilization as well as antibody  
321 incubation procedures, confocal imaging was taken by Yokogawa spinning disk  
322 confocal on an inverted Nikon Ti fluorescence microscope and then processed by  
323 Image J.

324

325

326 **Generation of METTL15 knockout cell lines**

327 The CRISPR-Cas9 targeting system was utilized as previously described (34). The  
328 guide RNA sequence is *METTL15* KO: 5'-TTGAGATCTGTGTAACCTCCT-3',  
329 targeting exon 3 of the NCBI *METTL15* reference sequence NM\_001113528.

330

331 **RNA immunoprecipitation (RIP)**

332 A total of 5 million METTL15-HA stable cells were crosslinked with 1%  
333 formaldehyde and then harvested and lysed in 3 volumes of lysis buffer (50 mM  
334 Tris-Cl [pH 7.5], 300 mM NaCl, 0.5 mM DTT, 0.25 % NP-40 with protease inhibitor)  
335 on ice for 15 min. After centrifugation at 14,000 rpm for 15 min at 4 °C, the  
336 supernatant was used for IP. For each RIP reaction, 5 million cells and 10 µl HA beads  
337 were used. After washing, the precipitated RNA samples were extracted by TRIzol  
338 directly and reverse transcribed, followed by qPCR detection.

339

340 ***In vitro* RNA methylation assay**

341 Recombinant rsmH wildtype and mutant proteins were expressed in the Rosetta (DE3)  
342 bacterial cells, which were incubated at 37 °C until OD600 reached ~ 0.6–1 and then  
343 cooled down to 16 °C. IPTG was added to 0.2 mM final concentration, and cells were  
344 further incubated at 16 °C for 16 h. Cell pellets were lysed in a buffer containing 300  
345 mM NaCl, 25 mM Tris pH 7.5, 10% Glycerol, 0.5% NP-40. Total lysate was

346 incubated with HisPur Ni-NTA Resin at 4 degree for 5 hours. His-rsmH protein was  
347 eluted with elution buffer (20 mM Tris pH7.5, 150 mM NaCl, 200mM Imidazole) in  
348 0.5 ml aliquots until color change was no longer observed (Bradford assay).

349

### 350 **Sucrose gradient sedimentation**

351 Sucrose gradient sedimentation was performed as previously described with minor  
352 modifications (35). For each sample, around 1 mg mitochondria protein lysate was  
353 used, and the lysates were loaded on a 10 ml 10 % – 30 % uncontinuous sucrose  
354 gradient (50 mM Tris-Cl, 100 mM KCl, 10 mM MgCl<sub>2</sub>) and centrifuged at 32,000  
355 rpm for 130 mins in a Beckman SW60-Ti rotor. A total of 16 fractions were collected  
356 from the top and used for RT-qPCR analyses.

357

### 358 **Seahorse assay**

359 An XF96 extracellular flux analyzer (seahorse bioscience) was used to determine the  
360 oxygen consumption rate(OCR) between WT and METTL15 KO cells, which were  
361 seeded at 15,000 cells per well. The concentrations of oligomycin, FCCP, rotenone  
362 and antimycin A are 1 μM, 1.5 μM, 0.5 μM and 0.5 μM, respectively.

363

364

### 365 **Isolation of a defined rRNA fragment**

366 To isolate the corresponding fragments of 12S rRNA containing known modified  
367 residues, we refer to the method as previously described (36) with minor  
368 modifications. Briefly, we used 200 pmol of biotin-tagged synthetic  
369 oligodeoxynucleotide probe and 100 µg of total RNA for one experiment and the  
370 sequences of the probes are listed in the supplementary table. After annealing and  
371 digestion with mung bean nuclease (NEB) and RNase A , the duplex of the probe and  
372 corresponding RNA fragment is purified with streptavidin C1.

373

### 374 **Processing of RNA samples for mass spectrometry**

375 The RNA sample is digested with 0.5U of Nuclease P1 (Sigma) in 80 µl NP1 buffer at  
376 42°C for 2 hours. To dephosphorylate the single nucleotides, 1U of CIP (NEB) is  
377 added and incubated for an hour at 37°C. The samples are filtered with Millex-GV  
378 0.22 µm filters before loaded onto the column of mass spec machine. 5 µl of solution  
379 was loaded into LC-MS/ MS (Agilent6410 QQQ triple-quadrupole mass  
380 spectrometer). Nucleosides were quantified by using retention time and nucleoside to  
381 base ion mass transitions of 244 to 112 (C), 258 to 126 (m<sup>4</sup>C and m<sup>5</sup>C), 258 to 112  
382 (Cm) and 272 to 126 (m<sup>4</sup>Cm).

383

384

### 385 **Bisulfite mapping of mC residues in mitochondrial RNA**

386 For purified mitochondria, mitochondrial RNA for bisulfite treatment was isolated  
387 with TRIzol and treated with TURBO DNase (Ambion) to remove mitochondrial  
388 DNA. Bisulfite treatment was performed with the EZ RNA methylation kit (Zymo  
389 research). Half of the treated RNA was used for bisulfite RNA-seq library preparation  
390 with NEBNext Ultra II Directional RNA Library Prep Kit (NEB), according to the  
391 manufacturers instructions. For the targeted bisulfite analysis, the bisulfite-treated  
392 RNA was directly converted to cDNA using PrimeScript RT Reagent Kit(Takara Bio,  
393 Inc.), followed by PCR amplification using primers specific for the region  
394 surrounding C839 of 12S mt-rRNA. The PCR products were separated from  
395 unincorporated primers using low melting agarose and submitted for Amplicon-EZ  
396 sequencing (Genewiz).

397

398 BS RNA-seq was carried out on Illumina NextSeq platform with single-end 75 bp  
399 read length. Raw reads were stripped of adaptor sequences and removed of low  
400 quality bases using Cutadapt. The processed reads were aligned to human  
401 mitochondrial genome with meRanT align(meRanTK, version 1.2.0) and the  
402 methylation ratio was calculated by meRanCall (meRanTK, version 1.2.0)(37).

403

## 404 **ACKNOWLEDGEMENTS**

405 We thank Alison Ringel and Kiran Kurmi for assistance with setting up the Seahorse  
406 experiments, Phillip A. Dumesic, Marwan Shinawi and Alberto Fernández Jaén for  
407 their insightful advice, and Noa Liberman-Isakov in Eric Greer's lab for providing the  
408 N<sup>4</sup>-Methyl-CTP standard. We also would like to thank Santa Cruz Biotechnology, Inc.  
409 and Abclonal, Inc. for providing antibodies.

410

411 *Authors contributions:* Y.S. and H.C. conceived and designed the project. H.C., Z.S.,  
412 K.C., C.Y. and Q.C. carried out the major experiments. H.C. and J.G. performed the  
413 bioinformatic analysis. M.H. supervised the analysis concerning the functions of  
414 METTL15 in mitochondria. Y.S. supervised the project throughout. Y.S., H.C. and Z.S.  
415 co-wrote the manuscript and all authors contributed to the manuscript writing.

416

## 417 **FUNDING**

418 Y. S. is supported by the NCI Outstanding Investigator Award (R35 CA210104-01)  
419 and by BCH funds. Y.S. is also an American Cancer Society Research Professor.

420

421 *Conflict of interest statement.* Y.S. is a consultant/Advisor for the Institutes of  
422 Biomedical Sciences, Fudan University, Shanghai Medical School. YS is a co-founder  
423 and equity holder of Constellation Pharmaceuticals, Inc, a consultant and an equity

424 holder of Guangzhou BeBetter Medicine Technology Co., LTD and an equity holder  
425 of Imago Biosciences. All other authors declare no competing financial interests.

## 426 REFERENCE

- 427 1. Costanzo MC & Fox TD (1990) Control of mitochondrial gene expression in *Saccharomyces*  
428 *cerevisiae*. *Annual review of genetics* 24:91-113.
- 429 2. Taanman JW (1999) The mitochondrial genome: structure, transcription, translation and  
430 replication. *Biochimica et biophysica acta* 1410(2):103-123.
- 431 3. Pearce SF, *et al.* (2017) Regulation of Mammalian Mitochondrial Gene Expression: Recent  
432 Advances. *Trends in biochemical sciences* 42(8):625-639.
- 433 4. Bohnsack MT & Sloan KE (2018) The mitochondrial epitranscriptome: the roles of RNA  
434 modifications in mitochondrial translation and human disease. *Cellular and molecular life*  
435 *sciences : CMLS* 75(2):241-260.
- 436 5. Sergiev PV, Aleksashin NA, Chugunova AA, Polikanov YS, & Dontsova OA (2018) Structural and  
437 evolutionary insights into ribosomal RNA methylation. *Nature chemical biology*  
438 14(3):226-235.
- 439 6. Dubin DT (1974) Methylated nucleotide content of mitochondrial ribosomal RNA from  
440 hamster cells. *Journal of molecular biology* 84(2):257-273.
- 441 7. Metodiev MD, *et al.* (2009) Methylation of 12S rRNA is necessary for in vivo stability of the  
442 small subunit of the mammalian mitochondrial ribosome. *Cell metabolism* 9(4):386-397.
- 443 8. Seidel-Rogol BL, McCulloch V, & Shadel GS (2003) Human mitochondrial transcription factor  
444 B1 methylates ribosomal RNA at a conserved stem-loop. *Nature genetics* 33(1):23-24.
- 445 9. Metodiev MD, *et al.* (2014) NSUN4 is a dual function mitochondrial protein required for both  
446 methylation of 12S rRNA and coordination of mitoribosomal assembly. *PLoS genetics*  
447 10(2):e1004110.
- 448 10. Spahr H, Habermann B, Gustafsson CM, Larsson NG, & Hallberg BM (2012) Structure of the  
449 human MTERF4-NSUN4 protein complex that regulates mitochondrial ribosome biogenesis.  
450 *Proceedings of the National Academy of Sciences of the United States of America*  
451 109(38):15253-15258.
- 452 11. Dubin DT, Taylor RH, & Davenport LW (1978) Methylation status of 13S ribosomal RNA from  
453 hamster mitochondria: the presence of a novel riboside, N4-methylcytidine. *Nucleic acids*  
454 *research* 5(11):4385-4397.
- 455 12. Taylor RW & Turnbull DM (2005) Mitochondrial DNA mutations in human disease. *Nature*  
456 *reviews. Genetics* 6(5):389-402.
- 457 13. Sharoyko VV, *et al.* (2014) Loss of TFB1M results in mitochondrial dysfunction that leads to  
458 impaired insulin secretion and diabetes. *Human molecular genetics* 23(21):5733-5749.
- 459 14. Fernandez-Vizarra E, Berardinelli A, Valente L, Tiranti V, & Zeviani M (2007) Nonsense  
460 mutation in pseudouridylate synthase 1 (PUS1) in two brothers affected by myopathy, lactic  
461 acidosis and sideroblastic anaemia (MLASA). *Journal of medical genetics* 44(3):173-180.
- 462 15. Garone C, *et al.* (2017) Defective mitochondrial rRNA methyltransferase MRM2 causes  
463 MELAS-like clinical syndrome. *Human molecular genetics* 26(21):4257-4266.
- 464 16. Shinawi M, *et al.* (2011) 11p14.1 microdeletions associated with ADHD, autism,  
465 developmental delay, and obesity. *American journal of medical genetics. Part A*  
466 155A(6):1272-1280.
- 467 17. Bradfield JP, *et al.* (2019) A Trans-ancestral Meta-Analysis of Genome-Wide Association  
468 Studies Reveals Loci Associated with Childhood Obesity. *Human molecular genetics*.



- 469 18. Schubert HL, Blumenthal RM, & Cheng X (2003) Many paths to methyltransfer: a chronicle of  
470 convergence. *Trends in biochemical sciences* 28(6):329-335.
- 471 19. Martin JL & McMillan FM (2002) SAM (dependent) I AM: the  
472 S-adenosylmethionine-dependent methyltransferase fold. *Current opinion in structural*  
473 *biology* 12(6):783-793.
- 474 20. Kimura S & Suzuki T (2010) Fine-tuning of the ribosomal decoding center by conserved  
475 methyl-modifications in the Escherichia coli 16S rRNA. *Nucleic acids research*  
476 38(4):1341-1352.
- 477 21. Decatur WA & Fournier MJ (2002) rRNA modifications and ribosome function. *Trends in*  
478 *biochemical sciences* 27(7):344-351.
- 479 22. Fukasawa Y, *et al.* (2015) MitoFates: improved prediction of mitochondrial targeting  
480 sequences and their cleavage sites. *Molecular & cellular proteomics : MCP* 14(4):1113-1126.
- 481 23. Schaefer M, Pollex T, Hanna K, & Lyko F (2009) RNA cytosine methylation analysis by bisulfite  
482 sequencing. *Nucleic acids research* 37(2):e12.
- 483 24. Kozbial PZ & Mushegian AR (2005) Natural history of S-adenosylmethionine-binding proteins.  
484 *BMC structural biology* 5:19.
- 485 25. Haute LV, *et al.* (2019) METTL15 introduces N4-methylcytidine into human mitochondrial 12S  
486 rRNA and is required for mitoribosome biogenesis. *Nucleic acids research*.
- 487 26. Wei Y, *et al.* (2012) Crystal and solution structures of methyltransferase RsmH provide basis  
488 for methylation of C1402 in 16S rRNA. *Journal of structural biology* 179(1):29-40.
- 489 27. Sullivan LB, *et al.* (2015) Supporting Aspartate Biosynthesis Is an Essential Function of  
490 Respiration in Proliferating Cells. *Cell* 162(3):552-563.
- 491 28. Wang T, *et al.* (2015) Identification and characterization of essential genes in the human  
492 genome. *Science* 350(6264):1096-1101.
- 493 29. Klinge S & Woolford JL, Jr. (2019) Ribosome assembly coming into focus. *Nature reviews.*  
494 *Molecular cell biology* 20(2):116-131.
- 495 30. Popova AM & Williamson JR (2014) Quantitative analysis of rRNA modifications using stable  
496 isotope labeling and mass spectrometry. *Journal of the American Chemical Society*  
497 136(5):2058-2069.
- 498 31. Shi Z, *et al.* (2019) Mettl17, a regulator of mitochondrial ribosomal RNA modifications, is  
499 required for the translation of mitochondrial coding genes. *FASEB journal : official publication*  
500 *of the Federation of American Societies for Experimental Biology*:fj201901331R.
- 501 32. Bournat JC & Brown CW (2010) Mitochondrial dysfunction in obesity. *Current opinion in*  
502 *endocrinology, diabetes, and obesity* 17(5):446-452.
- 503 33. Schulz TJ & Tseng YH (2013) Brown adipose tissue: development, metabolism and beyond.  
504 *The Biochemical journal* 453(2):167-178.
- 505 34. Shalem O, *et al.* (2014) Genome-scale CRISPR-Cas9 knockout screening in human cells.  
506 *Science* 343(6166):84-87.
- 507 35. Kehrein K, *et al.* (2015) Organization of Mitochondrial Gene Expression in Two Distinct  
508 Ribosome-Containing Assemblies. *Cell reports* 10(6):843-853.
- 509 36. Ma H, *et al.* (2019) N(6-)Methyladenosine methyltransferase ZCCHC4 mediates ribosomal  
510 RNA methylation. *Nature chemical biology* 15(1):88-94.
- 511 37. Rieder D, Amort T, Kugler E, Lusser A, & Trajanoski Z (2016) meRanTK: methylated RNA  
512 analysis ToolKit. *Bioinformatics* 32(5):782-785.

513 **Figure Legends**

514 **Figure 1. METTL15 localizes in the mitochondria.**

515 (A) Phylogenetic analysis demonstrating that METTL15 is likely an evolutionarily  
516 conserved m<sup>4</sup>C methyltransferase from fruitfly to human, but absent in worm and  
517 yeast;

518 (B) RIP-qPCR analysis of the interactions between METTL15-HA and indicated RNA  
519 species.

520 (C) Fluorescence confocal analysis of the subcellular location of wild type, and  
521 MTS-deletion METTL5 (Red), HSP60 (Green) was used as a marker for  
522 mitochondria.

523

524 **Figure S1.** (A) The bacterial m<sup>4</sup>Cm is localized in h44 of SSU rRNA.

525 (B) LC-MS/MS quantification of m<sup>4</sup>Cm in SSU rRNA demonstrating that  
526 considerable amount m<sup>4</sup>Cm on small subunit rRNA can be detected only in bacteria.

527 (C) The human SSU rRNA bears Cm and m<sup>6</sup>A but not m<sup>4</sup>Cm in h44 of SSU rRNA.

528

529 **Figure 2. METTL15 is the methyltransferase responsible for the m<sup>4</sup>C839 on**  
530 **mitochondrial 12S rRNA *in vivo*.**

531 (A) and (B) Relative methylation levels of 12S rRNA determined after sequencing of

532 cDNA obtained from bisulfite treated RNA from control (A) and METTL15 KO (B)

533 cells.

534 (C) LC-MS/MS chromatograms of C, m<sup>4</sup>C, and m<sup>5</sup>C in the corresponding 12S rRNA

535 fragments purified from total RNA. Samples from Ctrl, METTL15 KO cells were

536 analyzed.

537 (D) The m<sup>4</sup>C methylation is readily restored by re-expression of WT METTL15 but

538 not the catalytic mutant.

539

540 **Figure S2** (A) The mutation in the catalytic activity of METTL15 doesn't affect its

541 mitochondrial localization.

542 (B) LC-MS/MS chromatograms of C, m<sup>4</sup>C, and m<sup>5</sup>C standard.

543 (C) Targeted BSP sequencing shows that METTL15 KO induces a dramatic reduction

544 of m<sup>4</sup>C839 and m<sup>5</sup>C841 methylation, which is readily rescued by wild-type

545 METTL15. In contrast, m<sup>4</sup>C839 can not be restored by the catalytic mutant of

546 METTL15 at all while m<sup>5</sup>C841 is partially restored.

547 (D) The secondary structure of human SSU mt-rRNA 3' terminus and the localization

548 of m<sup>4</sup>C and m<sup>5</sup>C.

549

550 **Figure 3. METTL15 is the methyltransferase responsible for the m<sup>4</sup>C839 on**

551 **mitochondrial 12S rRNA *in vitro*.**

552 (A) *In vitro* methylation assay indicates that recombinant wild-type, but not catalytic  
553 mutant METTL15, is able to deposit a methyl group onto the N<sup>4</sup>-position of C839 in  
554 12S mt-rRNA.

555 (B) Human METTL15 prefers RNA oligos with unmodified C839.

556 (C) Bacterail rsmH methyltransferase shows stronger activity toward 2'-O  
557 methylated substrates.

558

559 **Figure S3** (A) Validation of recombinant METTL15 purification by Coomassie  
560 Blue staining(left) and Western blotting (right).

561 (B) Analysis of the crystal structure of rsmH shows that rsmH has a aromatic pocket  
562 that might be involved in recognizing 2'-O methylation of 2'-O-methylcytidine. Note:  
563 cytidine was used in the original co-crystal structure. The dash circle indicates the  
564 predicted position of 2'-O methyl group when rsmH uses 2'-O-methylcytidine as  
565 substrate.

566 (C) Purification and Coomassie Blue staining of purified recombinant bacterail  
567 rsmH.

568

569 **Figure 4. METTL15 is required for proper mitochondrial ribosome assembly**

570 **and the translation of genes encoded in the mitochondrial genome.**

571 (A) The distribution of the mitochondrial ribosome small and large subunits in the

572 indicated sucrose gradient fractions, examined by 12S and 16S rRNA RT-qPCR.

573 (B) The distribution of the mRNAs of the mitochondrial coding genes in the indicated

574 sucrose gradient fractions examined by RT-qPCR.

575 (C) Western blot analyses of ND6 and COX2 protein levels in the control and

576 METTL15 KO cells. The bar graph represents the quantification results of 2 replicate

577 experiments.

578

579 **Figure S4.** (A) Comparison of mitochondrial genome (mtDNA) copy number

580 between the Control and METTL15 KO cells, measured by RT-qPCR.

581 (B) Expression analysis by RT-qPCR of mitochondrial coding genes in the control

582 and METTL15 KO cells.

583 (C) The protein level of COX2 is downregulated in successfully edited cell lines (red

584 fonts) but not changed in parental or unedited cells (black fonts) .

585 (D) Western blot analysis of the indicated proteins in the control, METTL15 KO, and

586 METTL15 KO cells rescued with the wildtype or catalytic mutant of

587 METTL15-Flag-HA, respectively. LMNB1 and Actin were used as controls.

588

589 **Figure 5. METTL15 deletion facilitates the transformation from aerobic**  
590 **glycolysis to anaerobic glycolysis.**

591 (A) Oxygen consumption rate (OCR) of the control, METTL15 KO cells and the  
592 METTL15 KO cells with the wild type or catalytic mutation of METTL15-Flag-HA  
593 rescuing constructs measured by Seahorse XF96 machine.

594 (B) Quantification of the basal OCR for the indicated cells.

595 (C) Quantification of extracellular acidification rate (ECAR) for the indicated cells at  
596 the basal condition.

597 (D) Cellular metabolite concentration determined by liquid chromatography-tandem  
598 mass spectrometry (LC-MS/MS) in the control and METTL15 KO cells. All data are  
599 represented as mean  $\pm$  SD from four biological replicates. \*  $p < 0.05$ ; \*\*  $p < 0.01$ ; \*\*\*  
600  $p < 0.001$ , T test.

601

602 **Figure S5. (A) Images showing different medium colors of METTL15 KO cells**  
603 **rescued with either wildtype or catalytic mutant of METTL15, two days after the**  
604 **same numbers of cells were seeded.**

605 (B) Heatmap of the metabolites abundance change for control and METTL15 KO  
606 cells. Levels of various metabolites were acquired by LC-MS/MS.

607

Figure 1

A

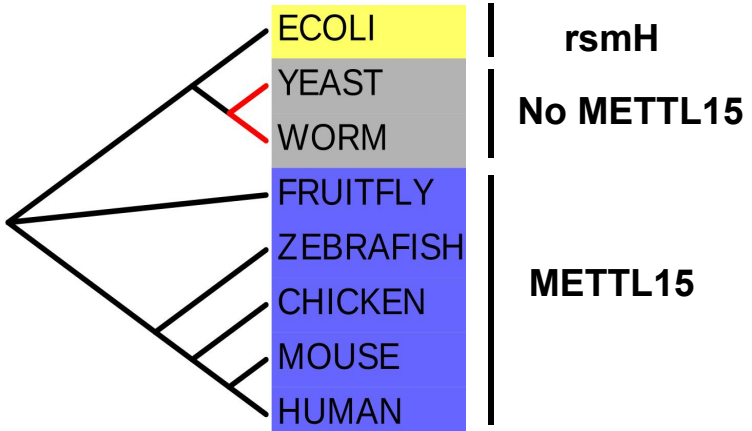

B

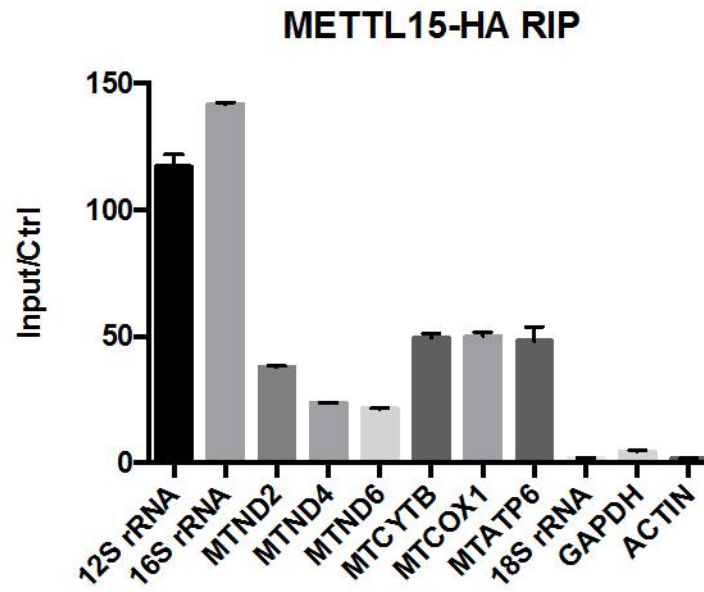

C

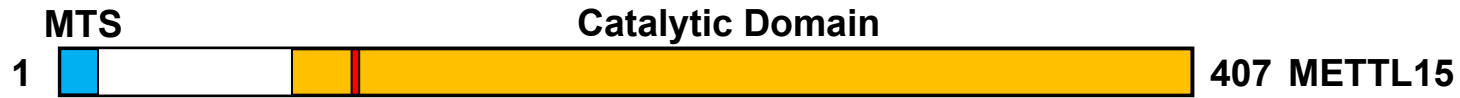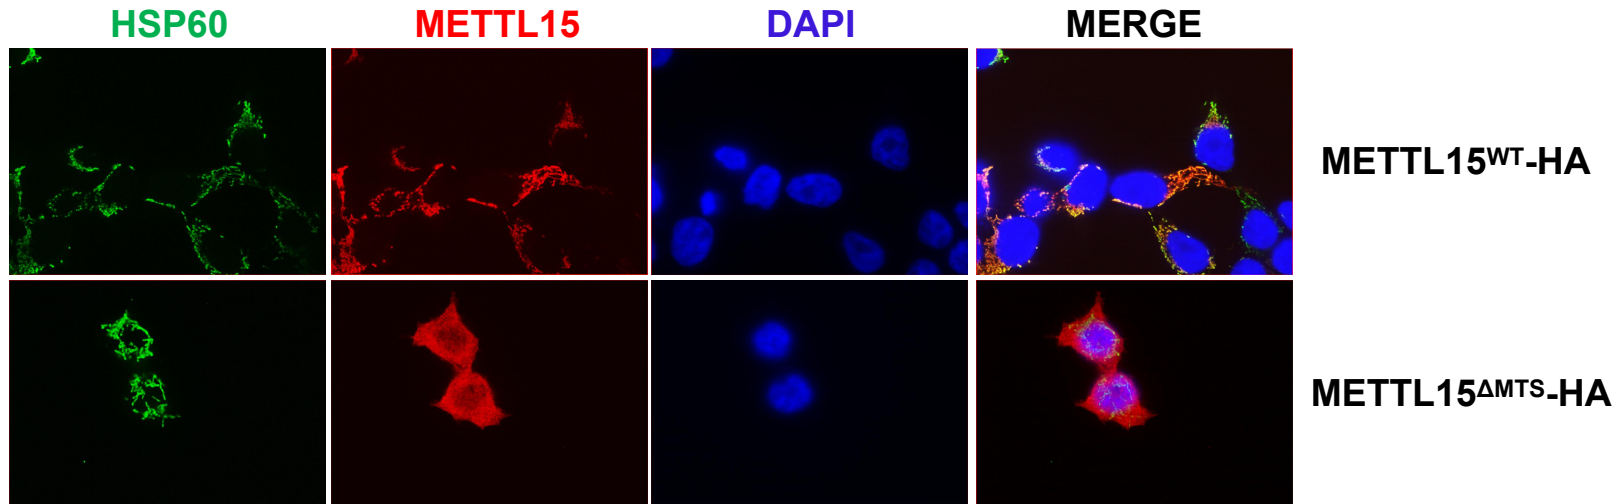

Figure S1

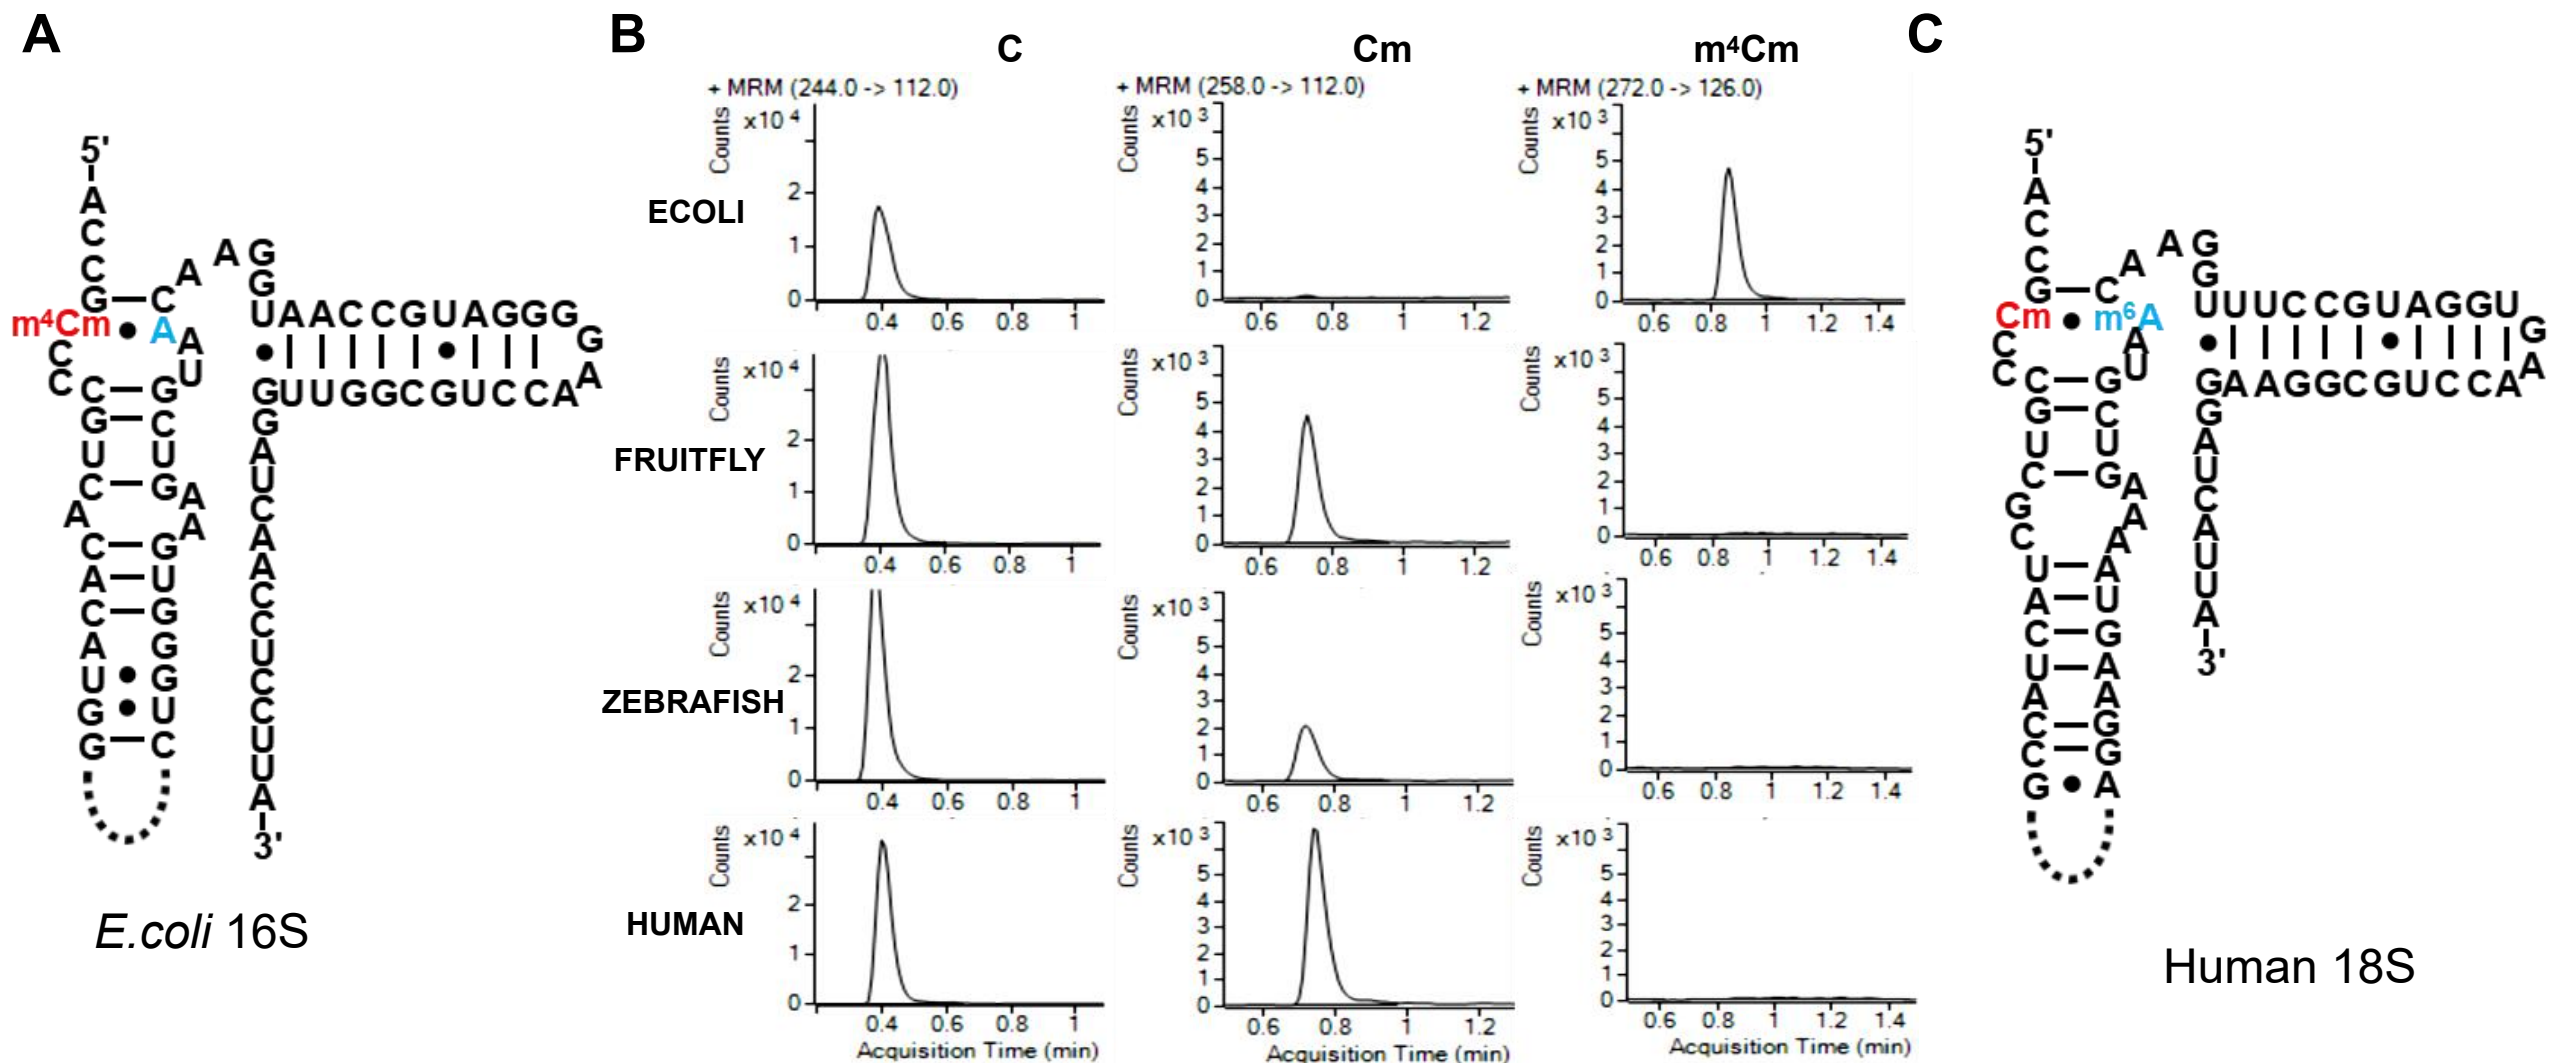



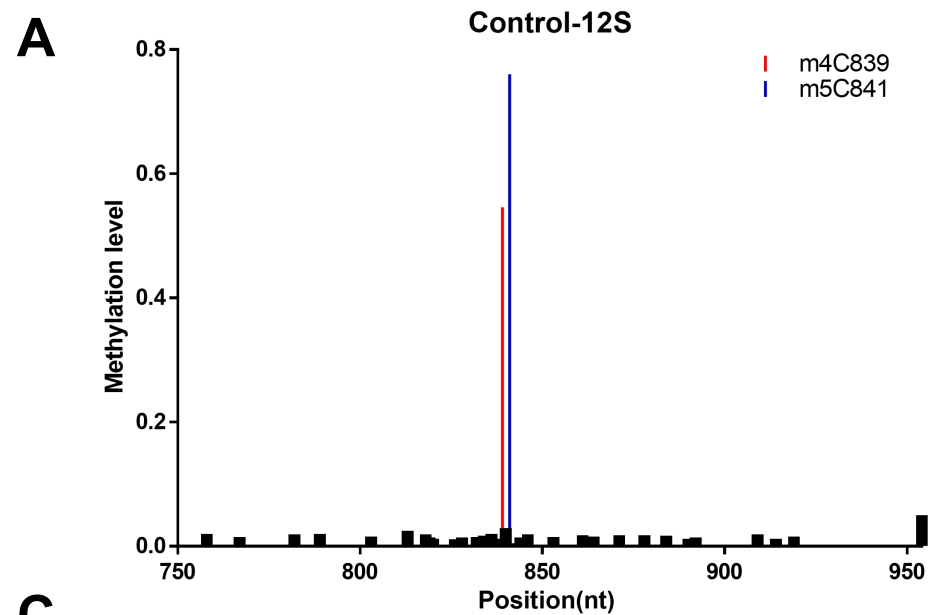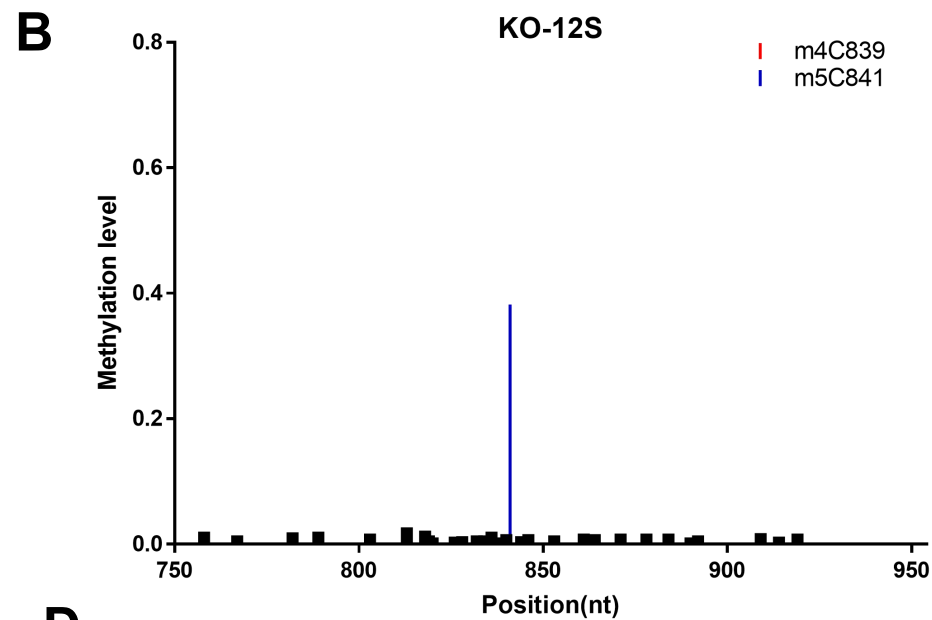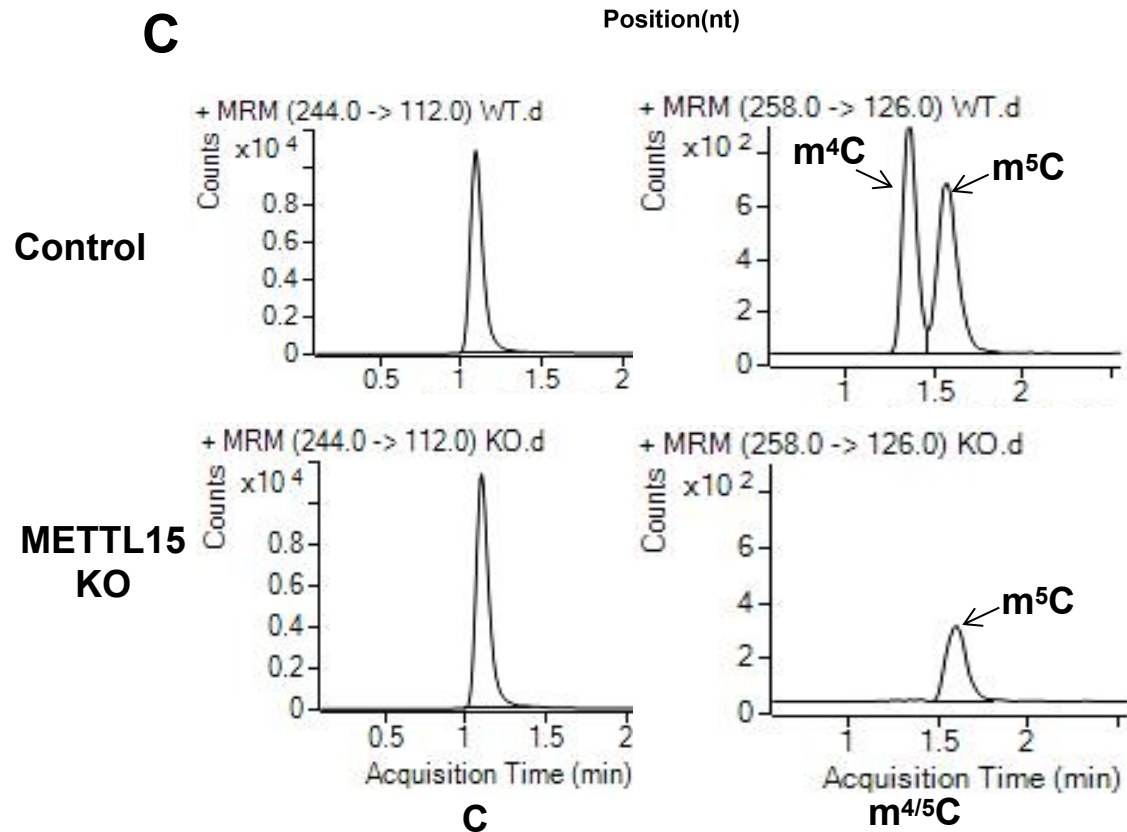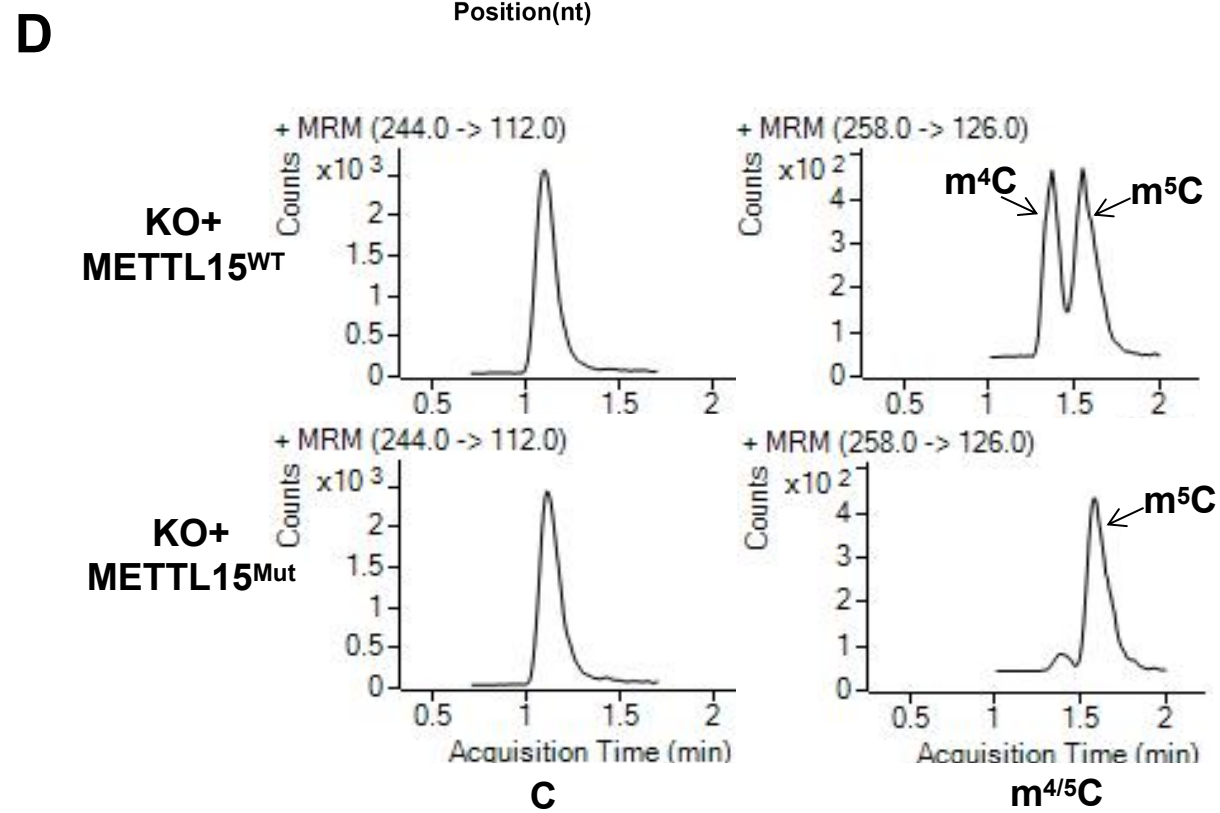

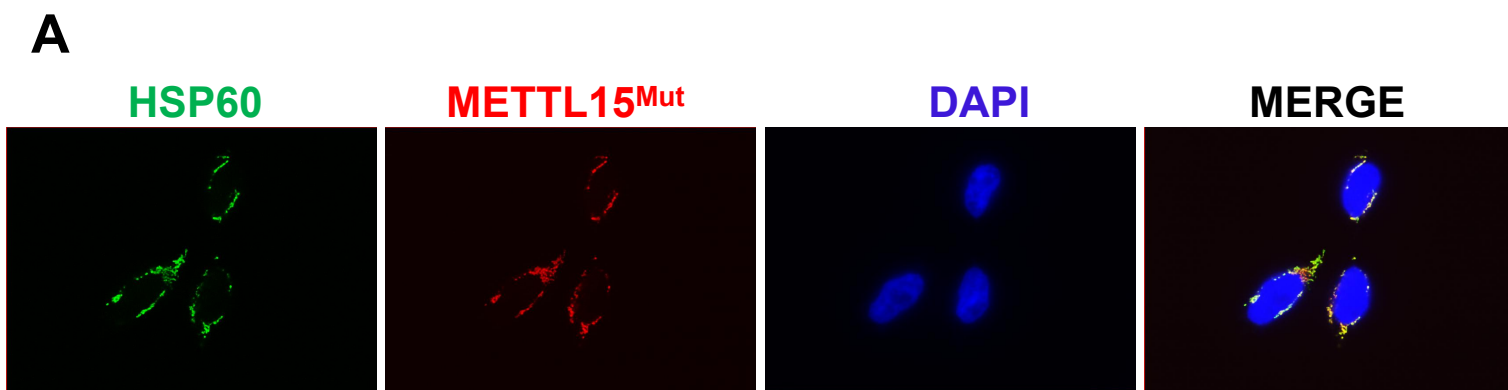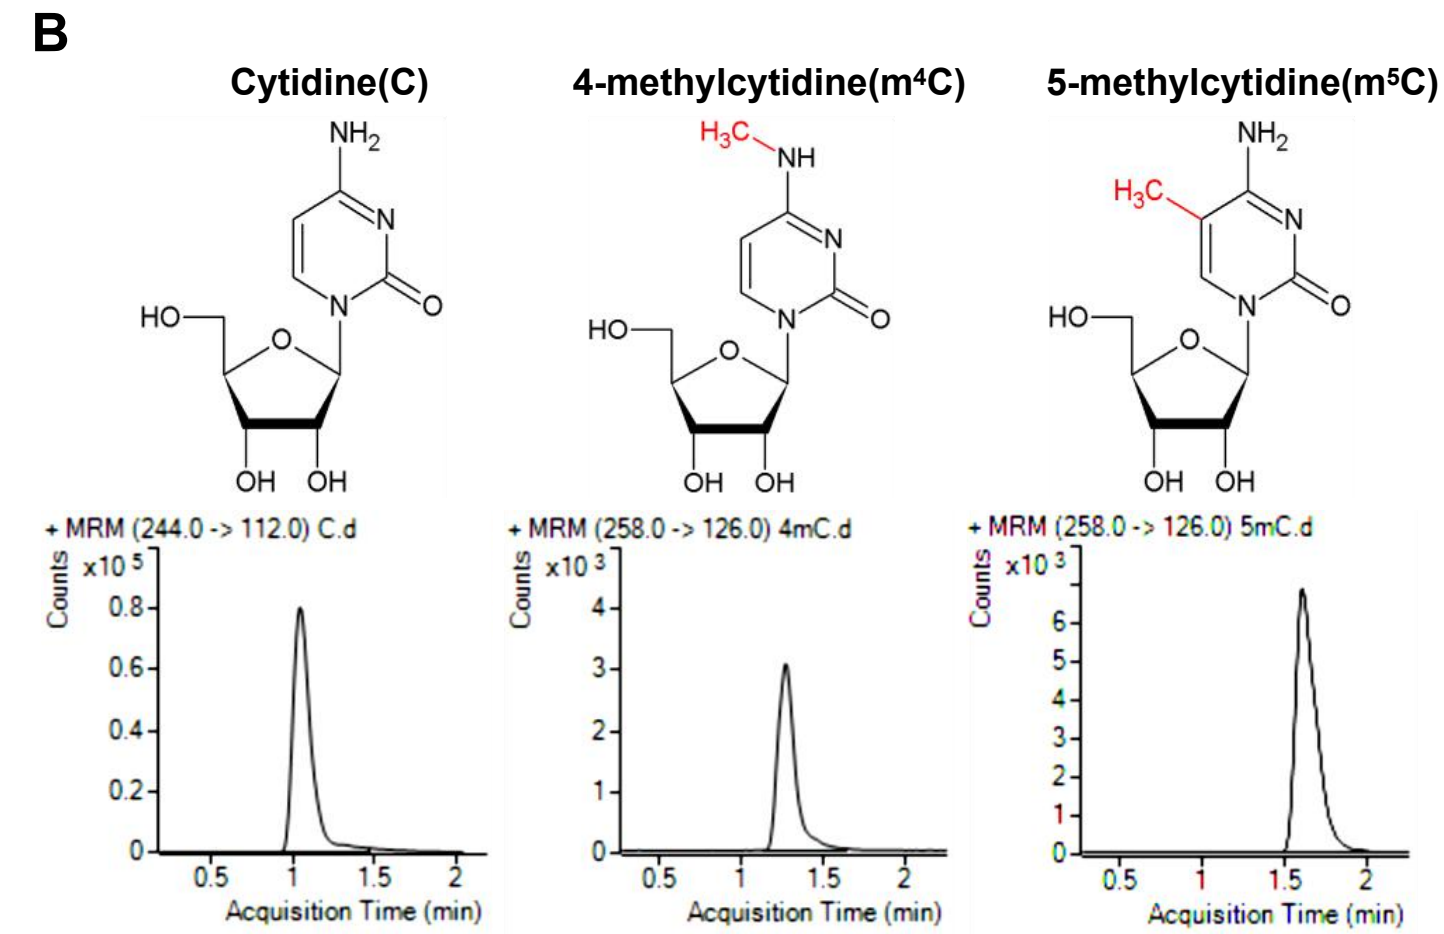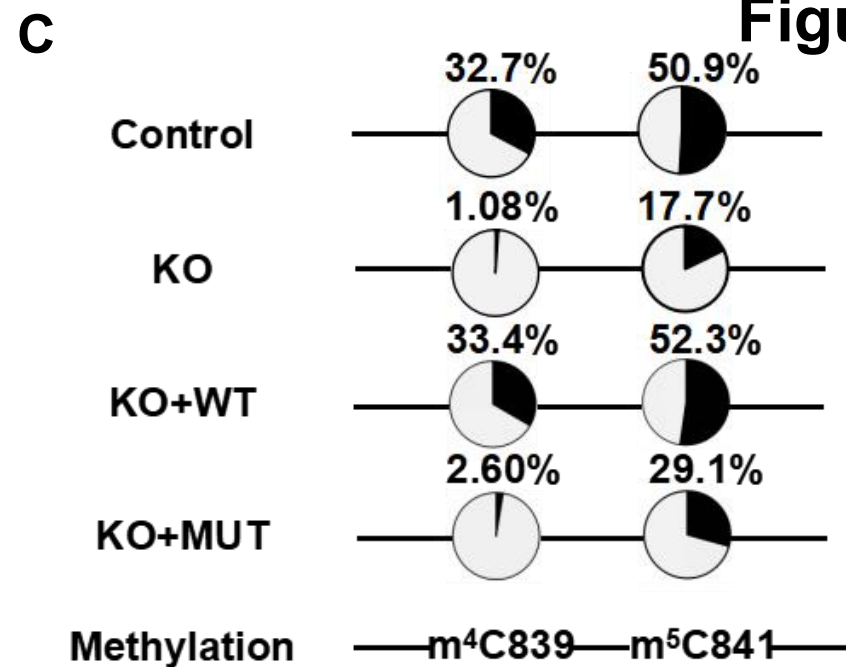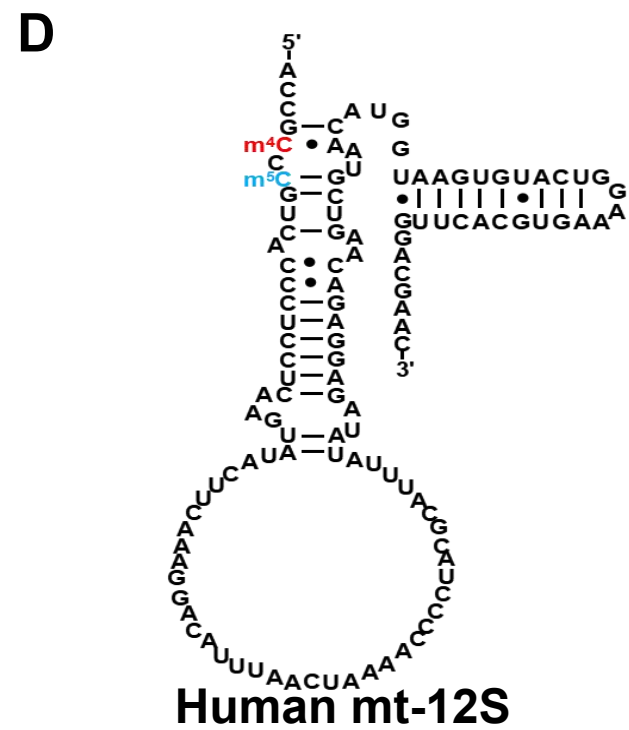

**A**

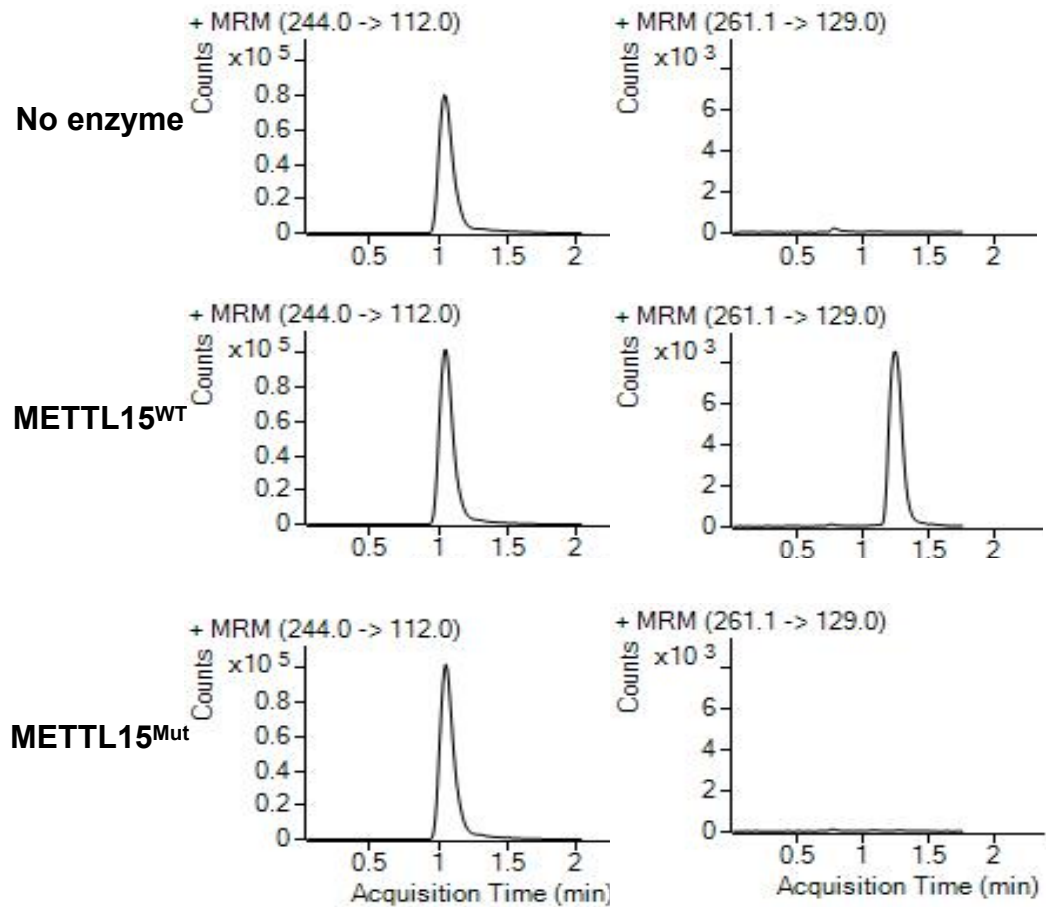

**B**

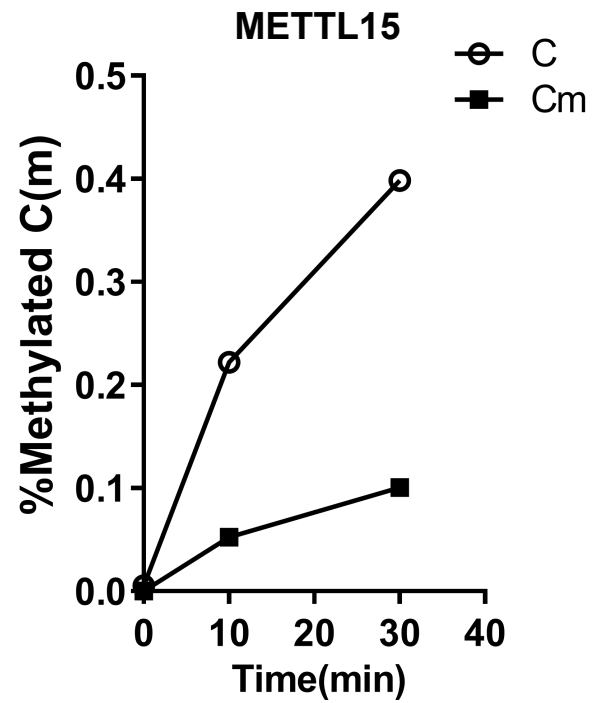

**C**

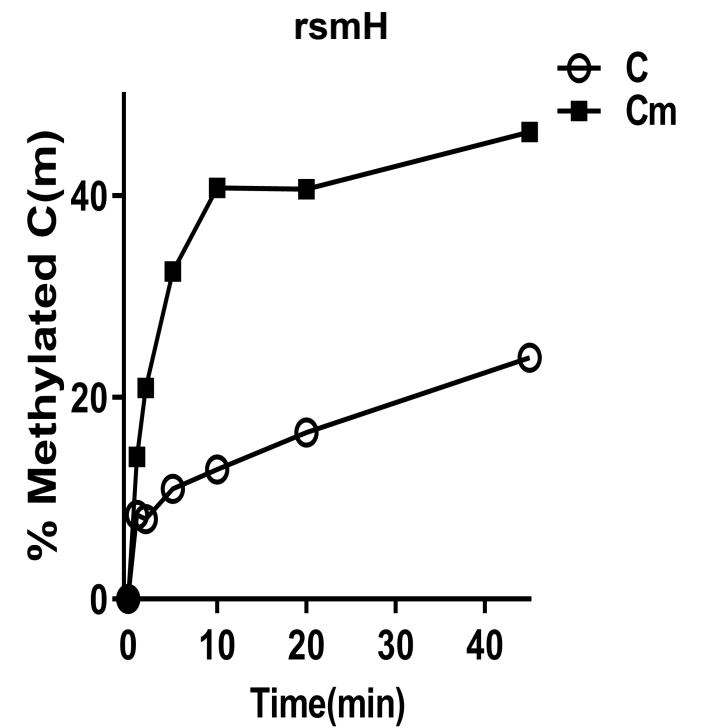

**C**

**d3-m<sup>4</sup>C**

**Figure S3**

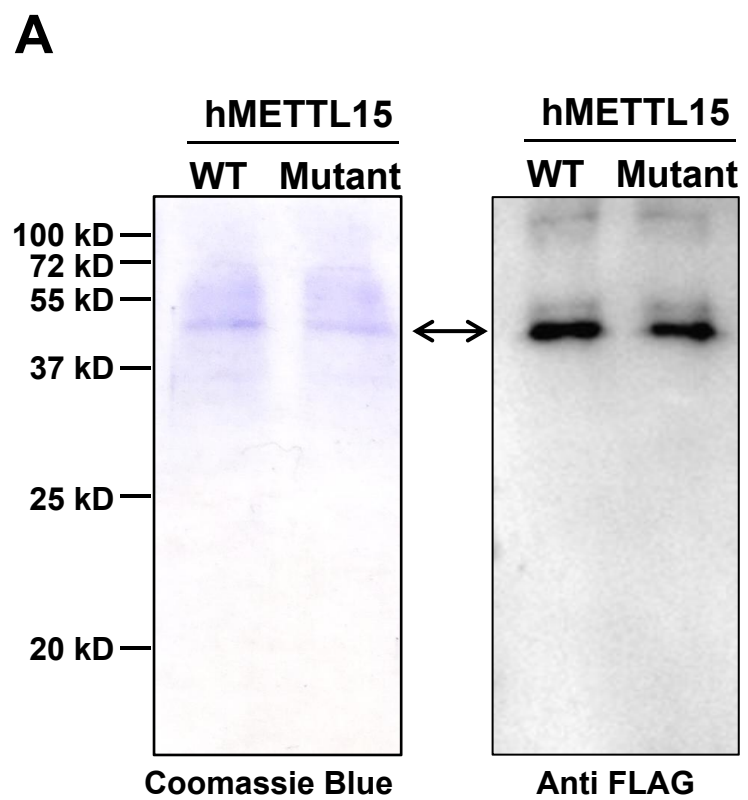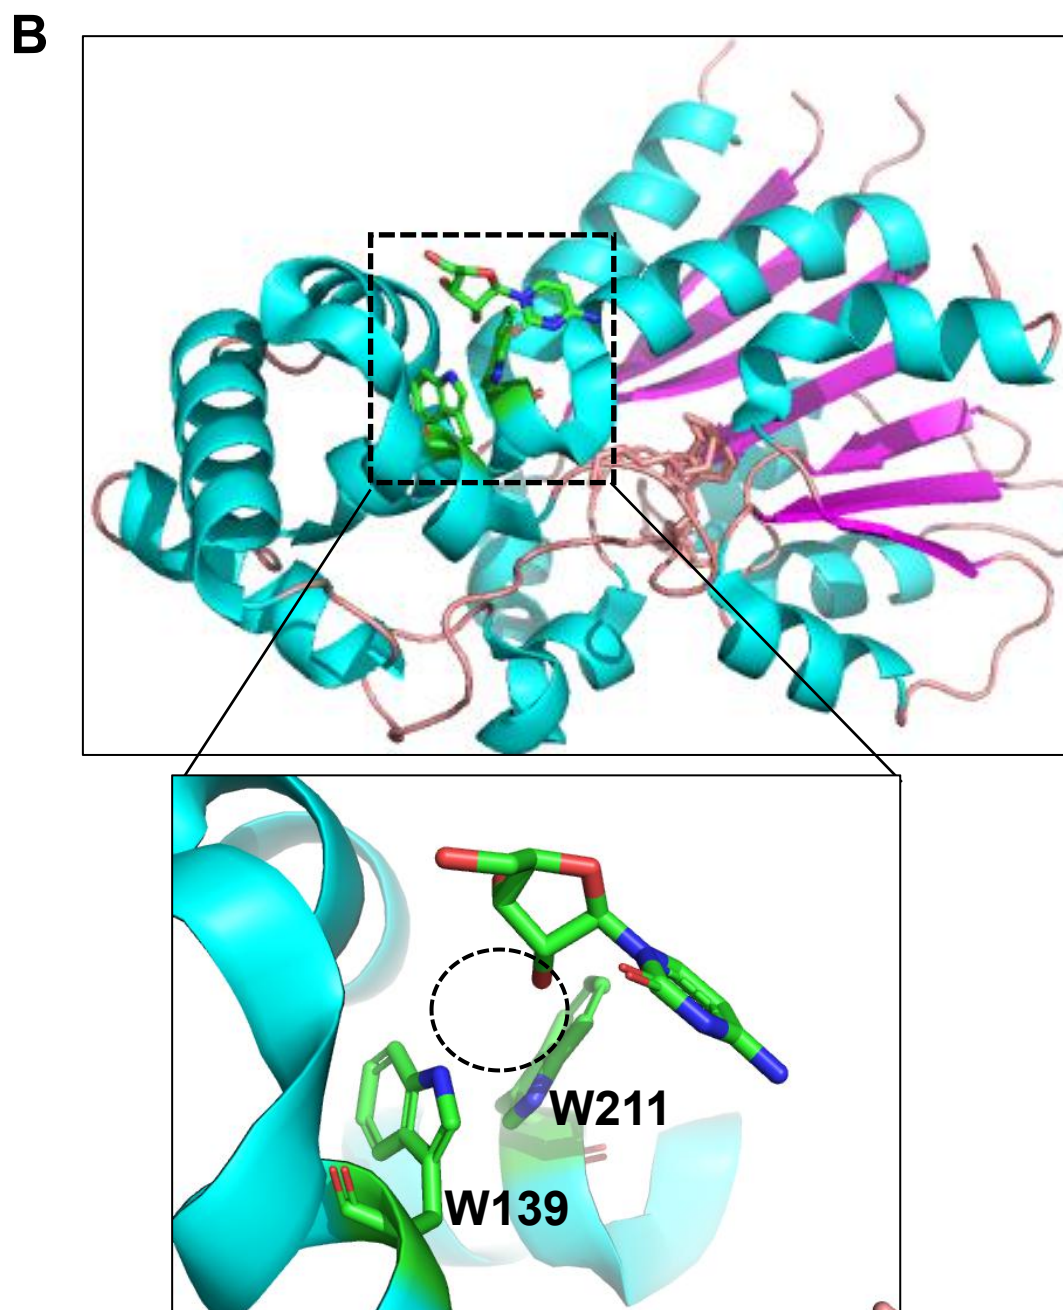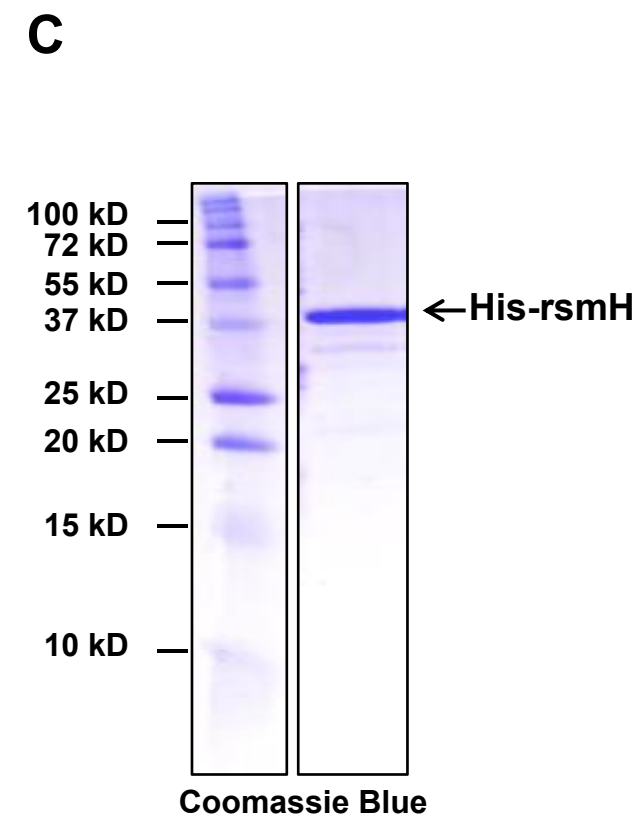

# Figure 4

**A**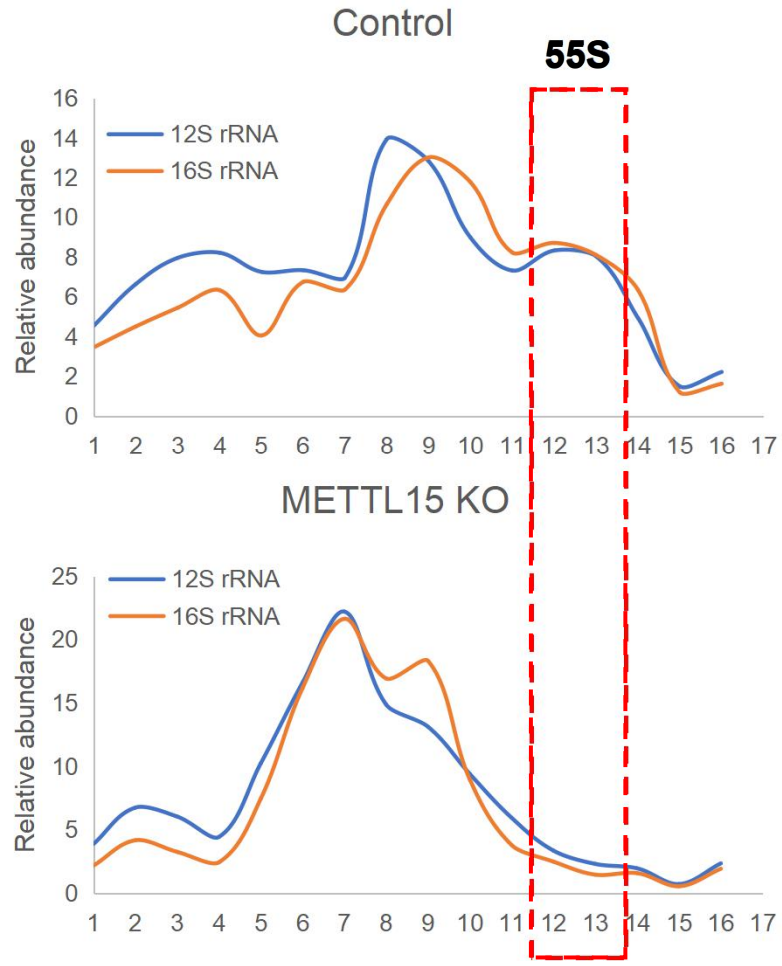**B**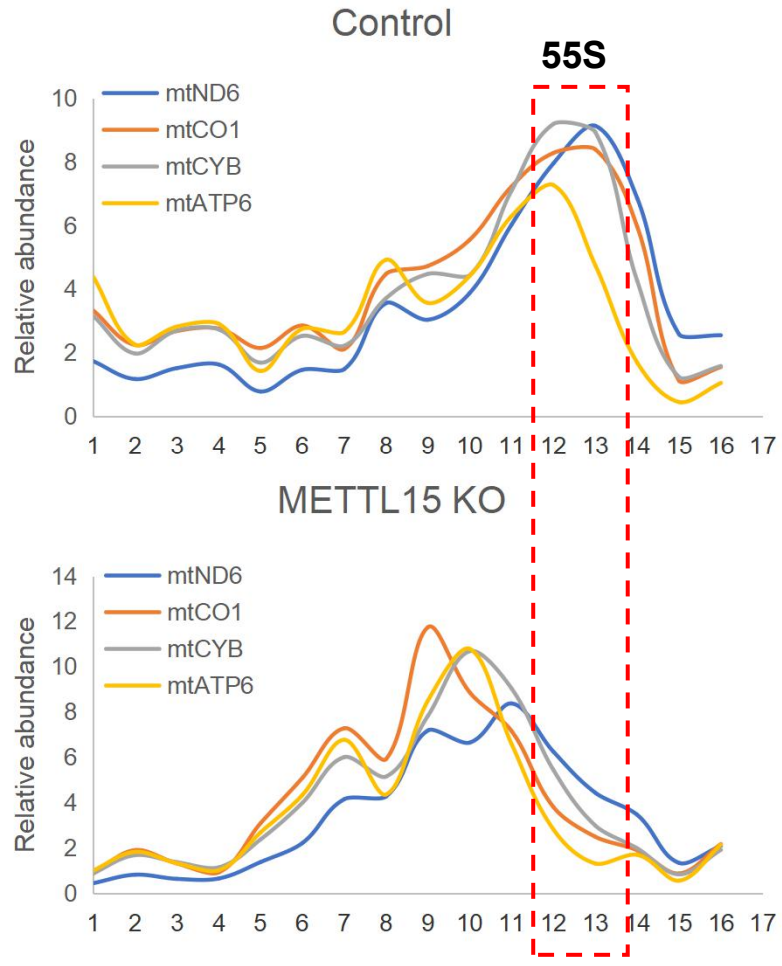**C**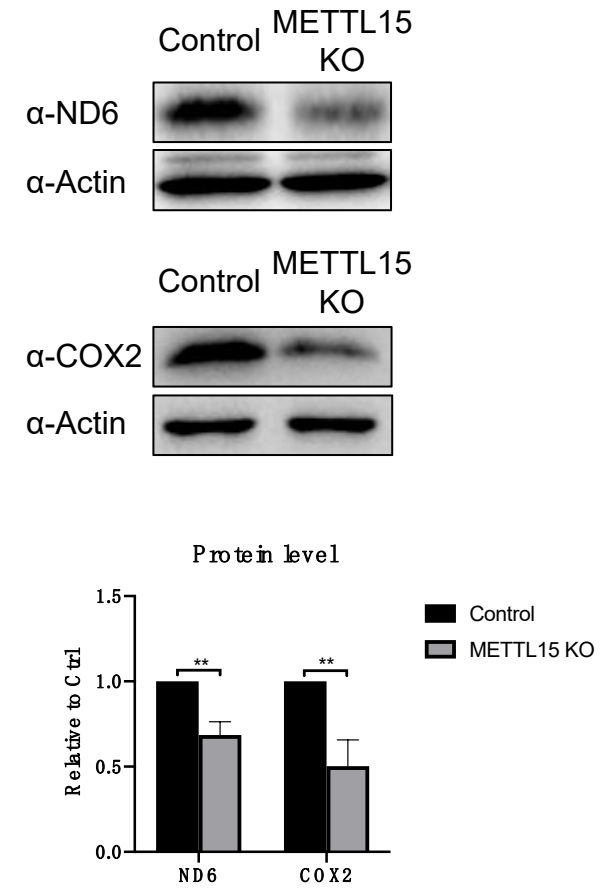

A

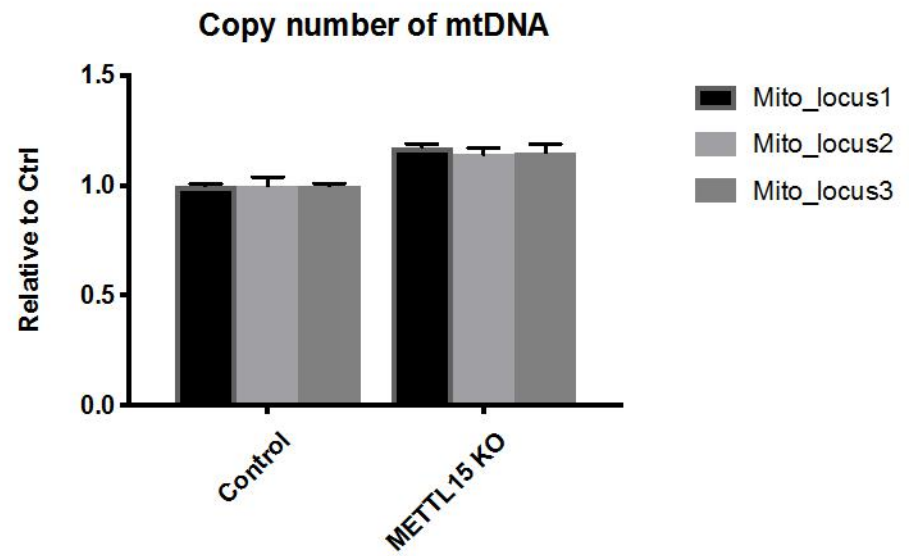

B

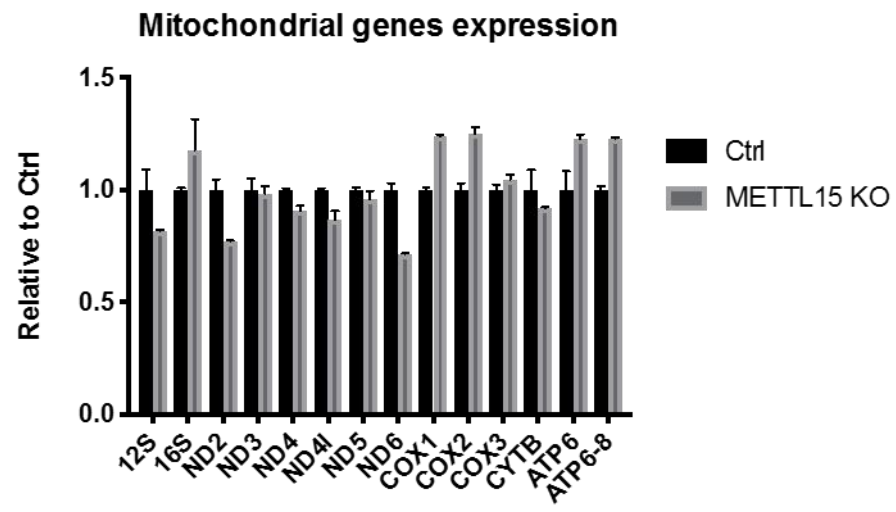

C

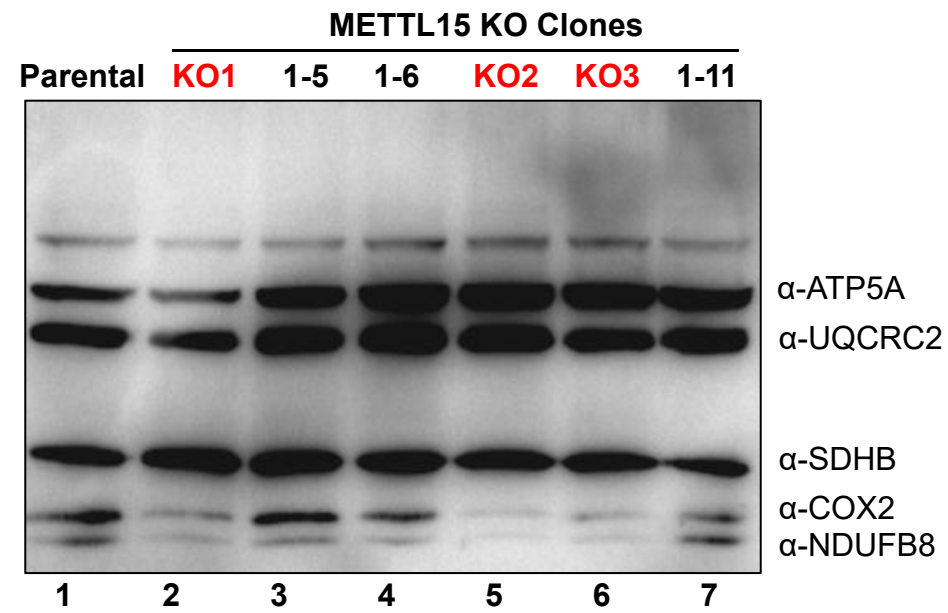

D

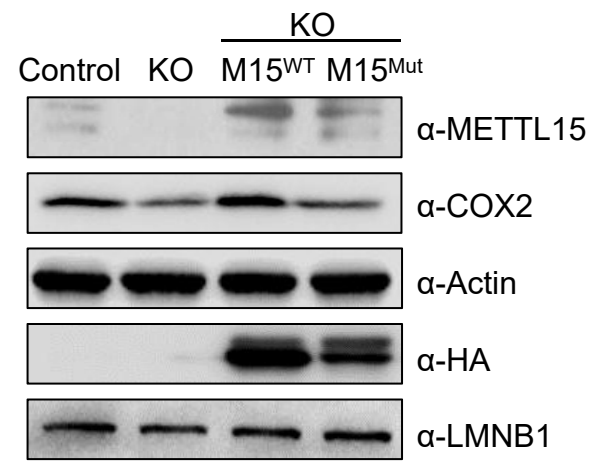

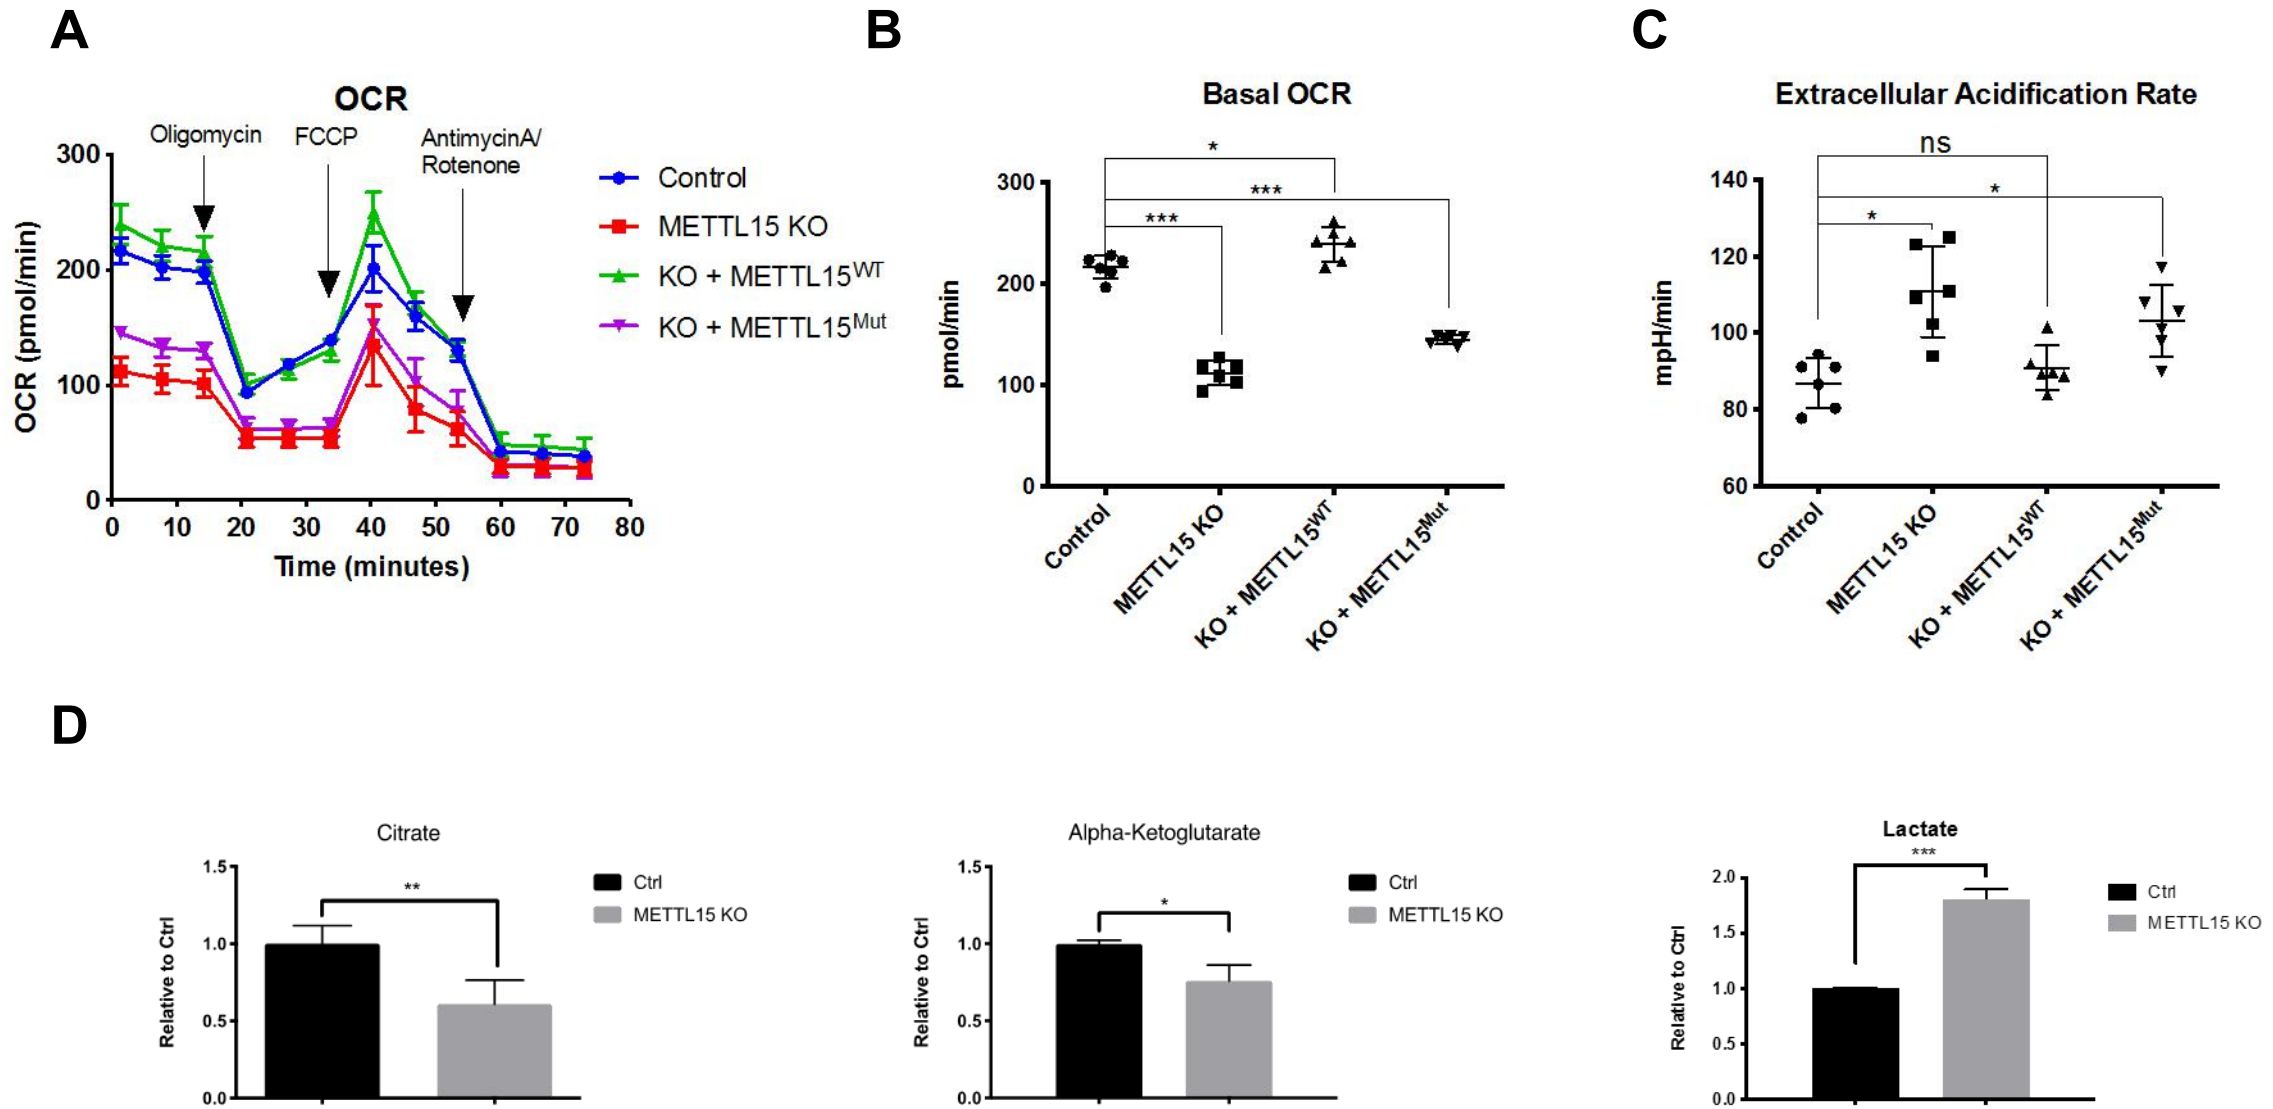

A

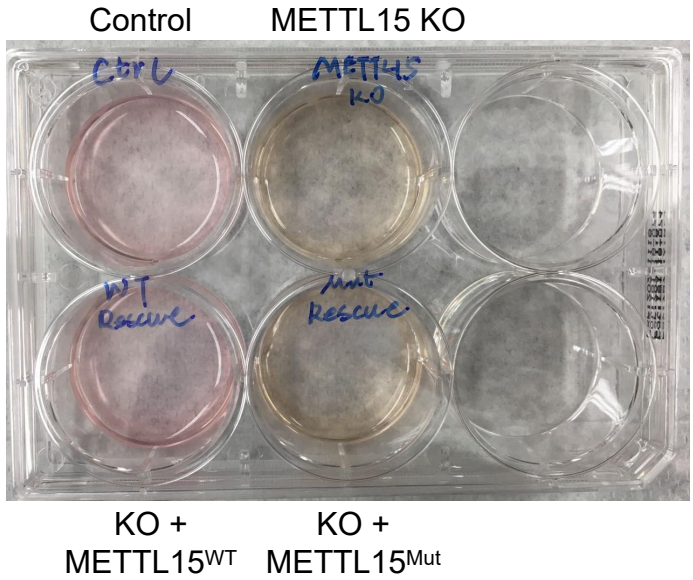

B

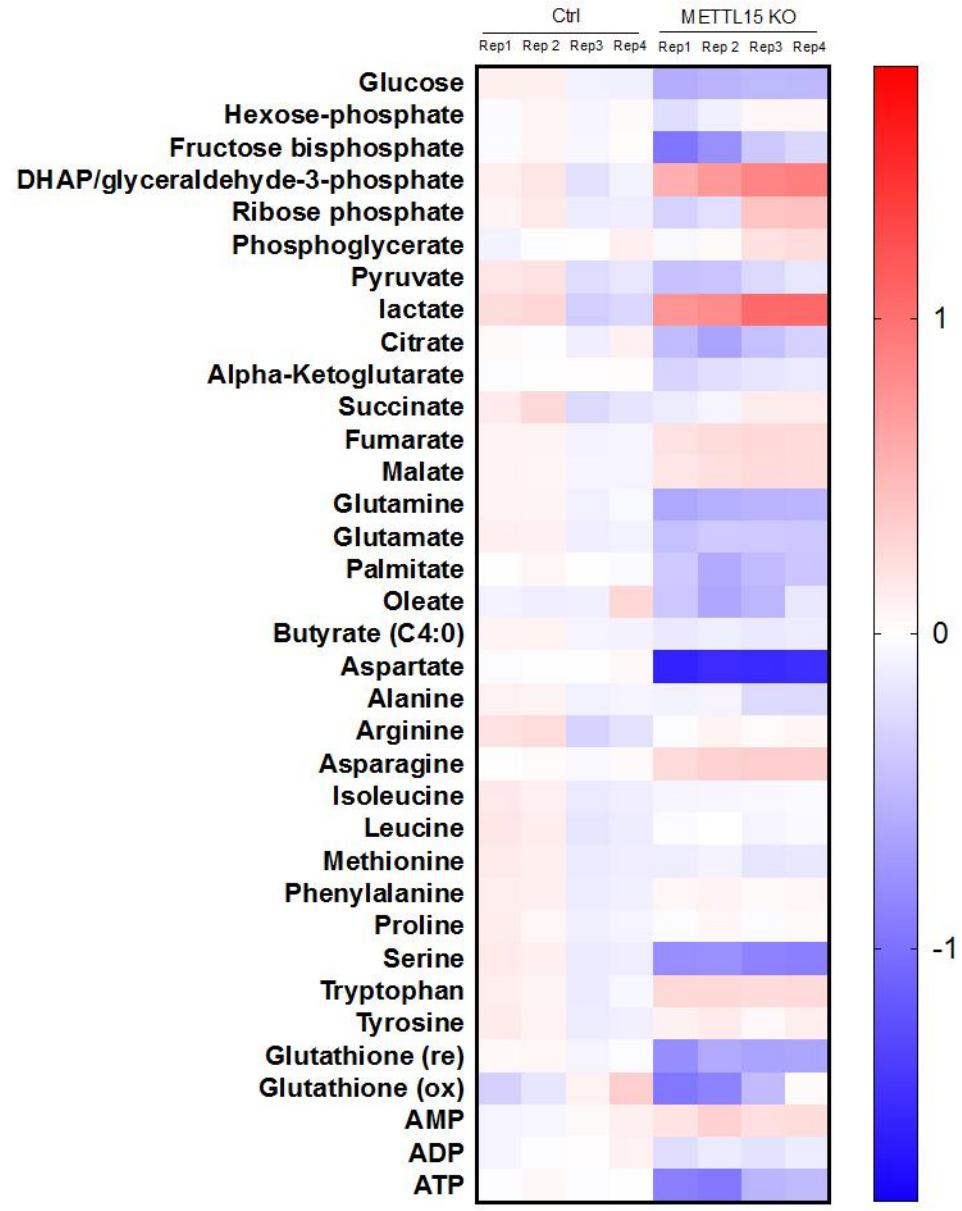

Source: https://www.biorxiv.org/content/biorxiv/early/2019/10/31/809756.full.pdf
